# Supplementary material for: Chemistry of transition metal carbene complexes: nucleophilic substitution reactions of cyanamide anion to Fischer carbene complexes
Source: Royal Society of Chemistry journal article supplement (doi:10.1039/c2dt31454a), 2012-10-11
Supplement: c2dt31454a.pdf [file c2dt31454a.pdf]

# Chemistry of Transition Metal Carbene Complexes <sup>7</sup>: Nucleophilic Substitution Reactions of Cyanamide Anion to Fischer Carbene Complexes: Kinetics and Computational Studies

Sumana Gangopadhyay, Tarun Mistri, Malay Dolai, Rabiul Alam and Mahammad Ali

Table S1. Details of solution preparation and observed pH values.

| Sl no. | [N≡C-NH <sub>2</sub> ] <sub>t</sub> /M | [KOH]/M | [N≡C-NH <sub>2</sub> ]/M | [N≡C-NH <sup>-</sup> ]/M | [N≡C-NH <sup>-</sup> ]/[N≡C-NH <sub>2</sub> ]/ | pH <sub>obs</sub> |
|--------|----------------------------------------|---------|--------------------------|--------------------------|------------------------------------------------|-------------------|
| 1      | 0.10                                   | 0.01    | 0.09                     | 0.01                     | 0.11                                           | 10.41             |
| 2      | 0.10                                   | 0.02    | 0.08                     | 0.02                     | 0.25                                           | 10.77             |
| 3      | 0.10                                   | 0.03    | 0.07                     | 0.03                     | 0.43                                           | 11.00             |
| 4      | 0.10                                   | 0.04    | 0.06                     | 0.04                     | 0.67                                           | 11.20             |
| 5      | 0.10                                   | 0.05    | 0.05                     | 0.05                     | 1.00                                           | 11.37             |
| 6      | 0.10                                   | 0.06    | 0.04                     | 0.06                     | 1.50                                           | 11.55             |
| 7      | 0.10                                   | 0.07    | 0.03                     | 0.07                     | 2.33                                           | 11.74             |
| 8      | 0.10                                   | 0.08    | 0.02                     | 0.08                     | 4.00                                           | 11.97             |
| 9      | 0.10                                   | 0.09    | 0.01                     | 0.09                     | 9.00                                           | 12.32             |

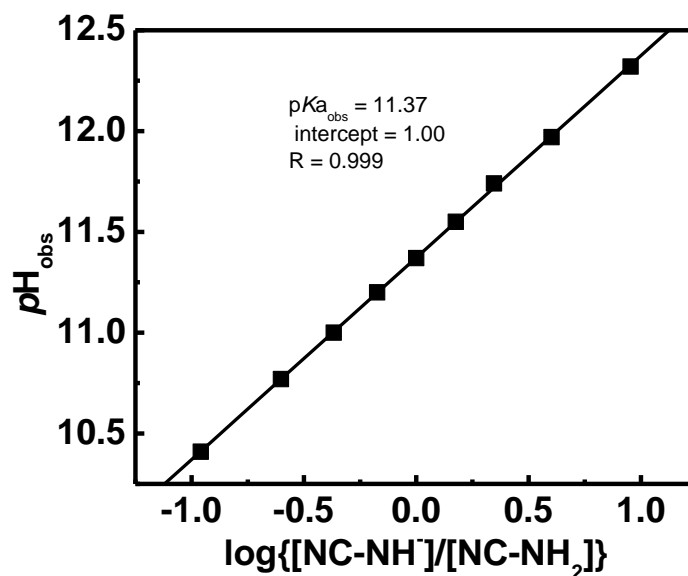

Figure S1(a). Plot of  $\text{pH}_{\text{obs}}$  vs.  $\log\{[\text{N}\equiv\text{C-NH}^-]/[\text{N}\equiv\text{C-NH}_2]\}$

**Synthesis of Cr-NHCN-OMe.** As a representative one we have prepared **Cr-NHCN-OMe** as follows: 0.171 g (0.5 mmol) of **Cr-OMe-OMe** was dissolved in 20 mL acetonitrile in a round bottom flask under Ar atmosphere. To this solution 2 mmol of  $N\equiv C-NH$  in 15 mL acetonitrile was added; the latter was prepared by reacting cyanamide with one equivalent of KOH dissolved in a minimum volume of water. The mixture was allowed to react for one hour whereupon the solvent was removed under high vacuum. The oily product was dissolved in a minimum volume of 50% MeCN-50%  $CH_2Cl_2$  (v/v) and charged on a silicagel column prepared with the same solvent mixture. The yellow band was collected and dried under high vacuum.  $^1H$  NMR (Bruker, 500 MHz)  $\delta$  ( $CDCl_3$ ): 3.66 ( $CH_3O$ ), 4.1 (NH), 7.02-7.70 ( $C_6H_4$ ). ES-MS $^+$ : (352)

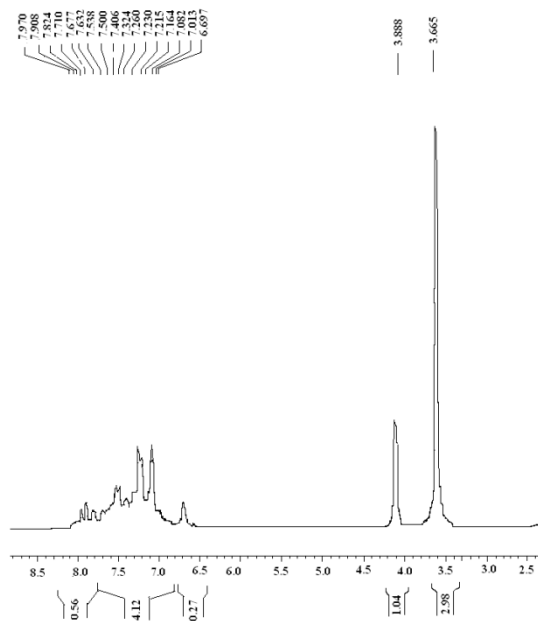

Figure S1(b).  $^1H$  NMR spectrum of Cr-NHCN-OMe in  $CDCl_3$  (Bruker 500 MHz).

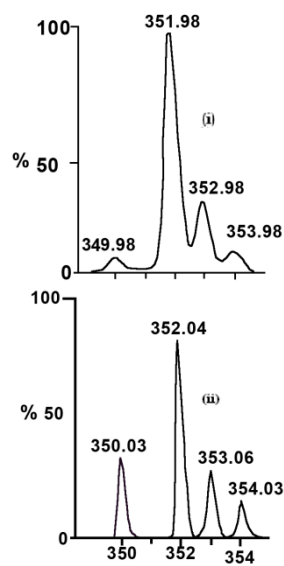

Figure S1(c). ESI-MS $^+$  of Cr-NHCN-OMe. (i) simulated spectra, (ii) Experimental one

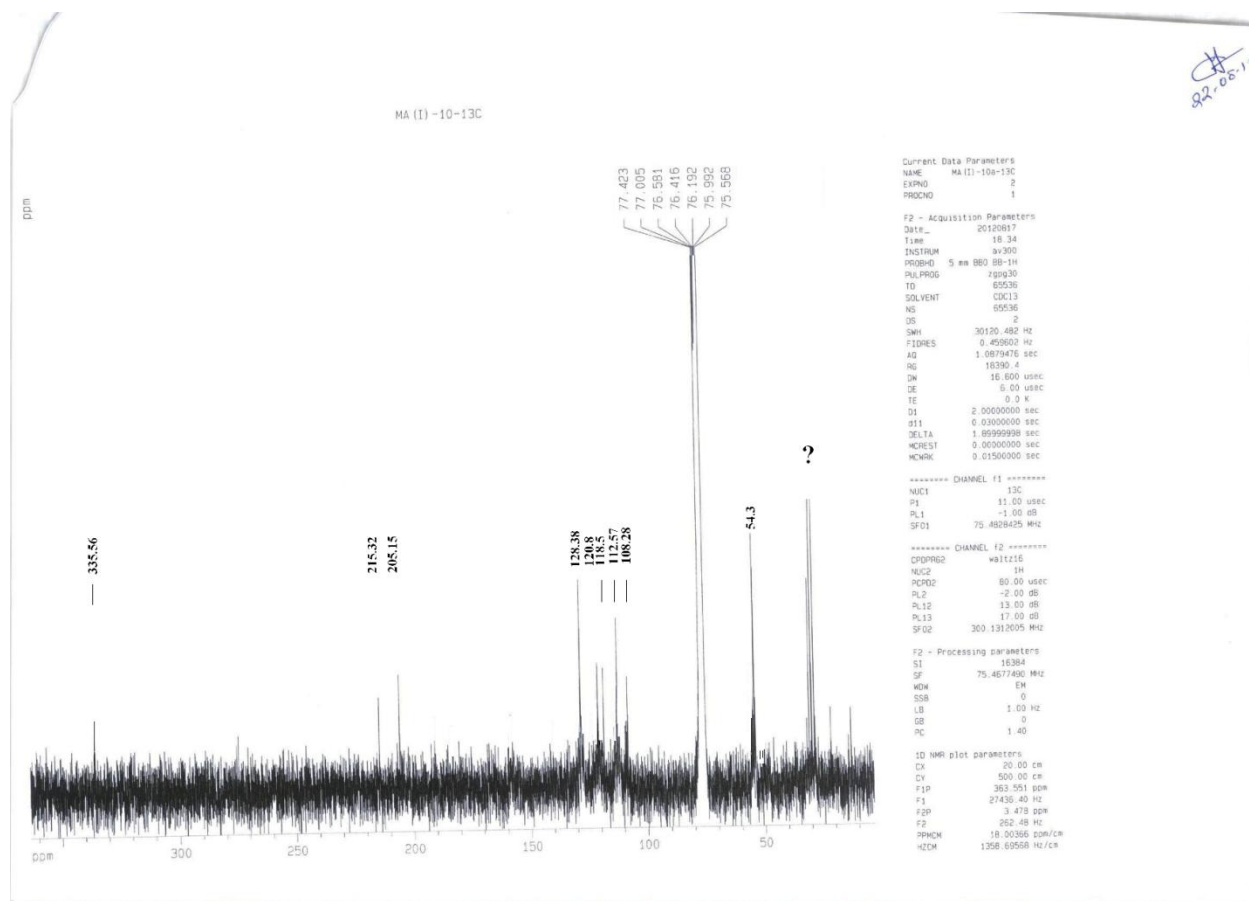

Figure S1(d). <sup>13</sup>C-NMR spectrum of Cr-NHCN-OMe in CDCl<sub>3</sub>

**Table S2(a).** Summary of pseudo-first-order rate constants ( $k_{\text{obs}}$ ,  $\text{s}^{-1}$ ) for the reaction between **Cr-SMe-Z** ( $Z = p\text{-CF}_3$ ,  $p\text{-Cl}$  and  $m\text{-Cl}$ ) as a function of pH in 50%  $\text{H}_2\text{O}$ -50% MeCN. Conditions are:  $[\text{C}] = 5.0 \times 10^{-5} \text{ M}$ ,  $[\text{H}_2\text{N-CN}]_{\text{t}} = 0.20 \text{ M}$ ,  $T = 25 \text{ }^\circ\text{C}$ .

| pH                                                                                     | $[\text{H}^+]/\text{M}$ | $K_{\text{obs}}(\text{Cr-SMe-CF}_3)$                 | $K_{\text{obs}}(\text{Cr-SMe-m-Cl})$                   | $K_{\text{obs}}(\text{Cr-SMe-p-Cl})$                 | $K_{\text{obs}}(\text{Cr-SMe-p-F})$                   | $K_{\text{obs}}(\text{Cr-SMe-p-Me})$                 | $K_{\text{obs}}(\text{Cr-SMe-p-OMe})$                |
|----------------------------------------------------------------------------------------|-------------------------|------------------------------------------------------|--------------------------------------------------------|------------------------------------------------------|-------------------------------------------------------|------------------------------------------------------|------------------------------------------------------|
| 10.66                                                                                  | 2.19e-11                | 0.41                                                 | 0.24                                                   | 0.23                                                 | 0.17                                                  | 0.07                                                 | 0.07                                                 |
| 11.05                                                                                  | 8.91e-12                | 0.98                                                 | 0.52                                                   | 0.52                                                 | 0.33                                                  | 0.15                                                 | 0.15                                                 |
| 11.34                                                                                  | 4.57e-12                | 1.75                                                 | 0.74                                                   | 0.64                                                 | 0.52                                                  | 0.22                                                 | 0.17                                                 |
| 11.56                                                                                  | 2.75E-12                | 2.15                                                 | 1.11                                                   | 1.23                                                 | 0.72                                                  | 0.29                                                 | 0.23                                                 |
| 11.76                                                                                  | 1.74e-12                | 3.10                                                 | 1.73                                                   | 1.66                                                 | 1.06                                                  | 0.36                                                 | 0.30                                                 |
| 11.96                                                                                  | 1.10E-12                | 3.69                                                 | 2.09                                                   | 2.20                                                 | 1.32                                                  | 0.42                                                 | 0.33                                                 |
| 12.14                                                                                  | 7.24E-12                | 4.23                                                 | 2.45                                                   | 2.54                                                 | 1.80                                                  | 0.49                                                 | 0.45                                                 |
| 12.46                                                                                  | 3.47e-13                | 4.50                                                 | 3.45                                                   | 3.11                                                 | 2.50                                                  | 0.56                                                 | 0.47                                                 |
| 12.77                                                                                  | 1.70e-13                | 4.90                                                 | 3.95                                                   | 3.65                                                 | 2.90                                                  | 0.63                                                 | 0.52                                                 |
| $k_1/\text{M}^{-1}\text{s}^{-1} \rightarrow$<br>$K_{\text{a}}^{\text{NH}} \rightarrow$ |                         | $26.8 \pm 0.70$<br>$(2.19 \pm 0.07) \times 10^{-12}$ | $23.48 \pm 0.67$<br>$(0.895 \pm 0.07) \times 10^{-12}$ | $20.8 \pm 0.56$<br>$(1.26 \pm 0.08) \times 10^{-12}$ | $18.20 \pm 0.70$<br>$(0.70 \pm 0.05) \times 10^{-12}$ | $3.29 \pm 0.07$<br>$(2.18 \pm 0.14) \times 10^{-12}$ | $2.27 \pm 0.14$<br>$(2.12 \pm 0.34) \times 10^{-12}$ |

**Table S2(b).** Summary of pseudo-first-order rate constants for the reaction between **M-SMe-H** (M Cr and W) as a function of pH in 50%  $\text{H}_2\text{O}$ -50% MeCN. Conditions are:  $[\text{C}] = 5.0 \times 10^{-5} \text{ M}$ ,  $[\text{H}_2\text{N-CN}]_{\text{t}} = 0.05 \text{ M}$ ,  $T = 25 \text{ }^\circ\text{C}$ .

| pH                                              | $[\text{H}^+]/\text{M}$ | $k_{\text{obs}}(\text{Cr-SMe-H})/\text{s}^{-1}$                                   | $k_{\text{obs}}(\text{W-SMe-H})/\text{s}^{-1}$                                    |
|-------------------------------------------------|-------------------------|-----------------------------------------------------------------------------------|-----------------------------------------------------------------------------------|
| 10.52                                           | 3.02E-11                | 0.043                                                                             | 0.19                                                                              |
| 10.93                                           | 1.17E-11                | 0.059                                                                             | 0.41                                                                              |
| 11.17                                           | 6.76E-12                | 0.146                                                                             | 0.63                                                                              |
| 11.37                                           | 4.27E-12                | 0.195                                                                             | 0.84                                                                              |
| 11.55                                           | 2.82E-12                | 0.252                                                                             | 1.04                                                                              |
| 11.74                                           | 1.82E-12                | 0.305                                                                             | 1.24                                                                              |
| 11.94                                           | 1.15E-12                | 0.346                                                                             | 1.43                                                                              |
| 12.20                                           | 6.31E-13                | 0.399                                                                             | 1.66                                                                              |
| 12.51                                           | 3.09E-13                | 0.463                                                                             | 1.84                                                                              |
| $k_1 \rightarrow$<br>$K_{\text{a}} \rightarrow$ |                         | $40.24 \pm 0.27 \text{ M}^{-1}\text{s}^{-1}$<br>$(2.98 \pm 0.06) \times 10^{-12}$ | $10.26 \pm 0.33 \text{ M}^{-1}\text{s}^{-1}$<br>$(2.52 \pm 0.23) \times 10^{-12}$ |

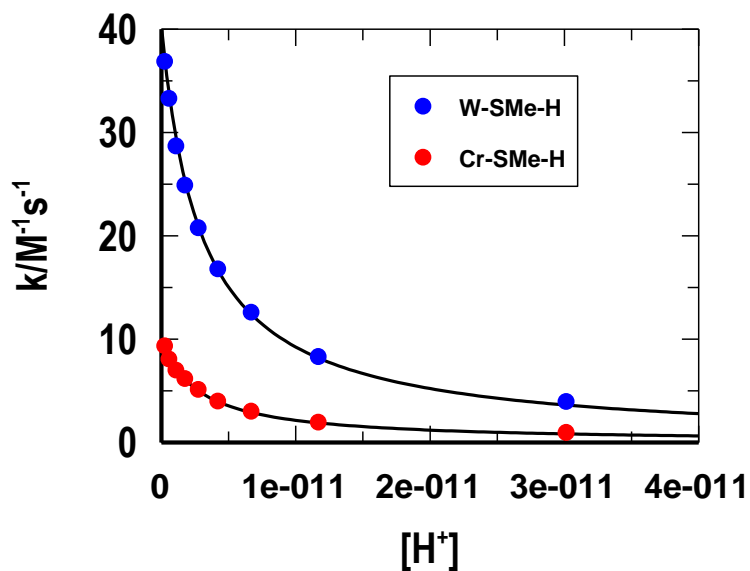

Figure S2(a). Plots of  $k$  ( $M^{-1}s^{-1}$ ) vs.  $[H^+]$  for the reaction of W-XMe-H ( $X = O$  and S) with  $N\equiv C-NH^-$  at different pH in 50%MeCN-50%  $H_2O$ . Conditions are:  $[C] = 5.0 \times 10^{-5} M$ ,  $[NH_2-CN] = 0.05 M$  and temperature  $25^\circ C$

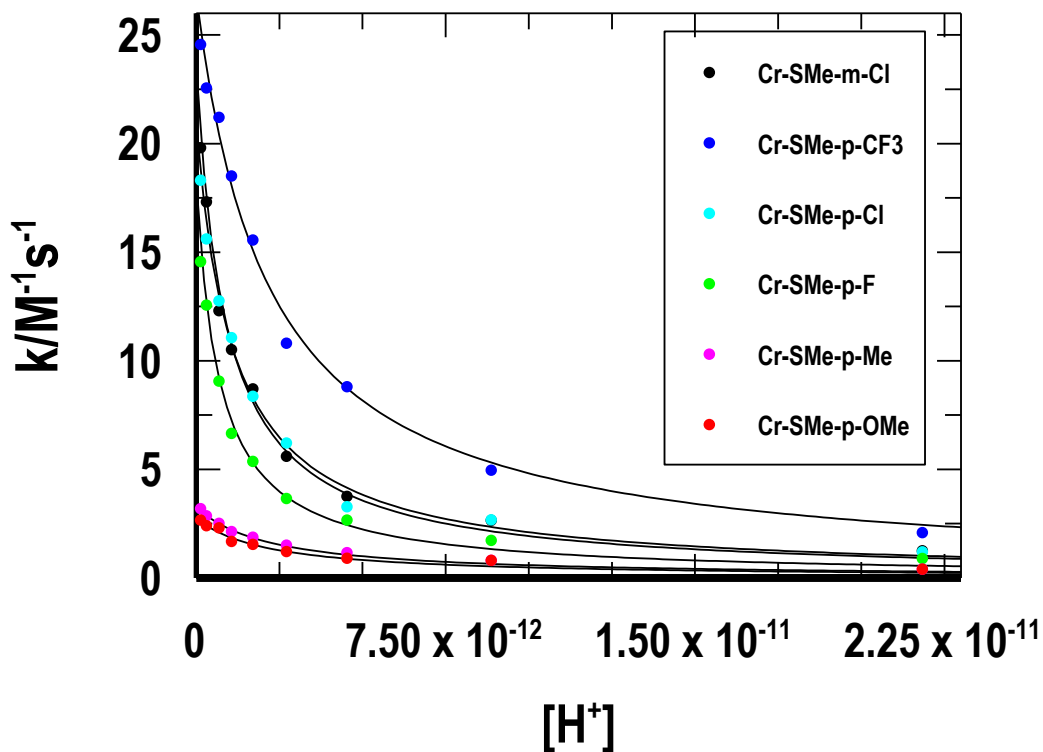

Figure S2(b). Plot of  $k$  vs.  $[H^+]$  for the reaction of  $NC-NH^-$  with Cr-SMe-Z in 50%  $H_2O$ -50% MeCN at different pH. Conditions are:  $[C] = 5.0 \times 10^{-5} M$ ,  $[H_2N-CN]_t = 0.20 M$ ,  $T = 25^\circ C$ .

**Table S3(a).** Summary of Data for the reaction between **Cr-OMe-NMe<sub>2</sub>** with **N≡C-NH<sup>-</sup>** in 50%-MeCN-50% H<sub>2</sub>O at 25 °C.

| [CAN]/M  | $k_{\text{obs}}^1/\text{s}^{-1}(\text{Cr-OMe-}p\text{-NMe}_2)$ |
|----------|----------------------------------------------------------------|
| 0.005    | 0.0079                                                         |
| 0.015    | 0.021                                                          |
| 0.025    | 0.04                                                           |
| 0.035    | 0.059                                                          |
| 0.05     | 0.086                                                          |
| 1.00E-01 | 0.159                                                          |

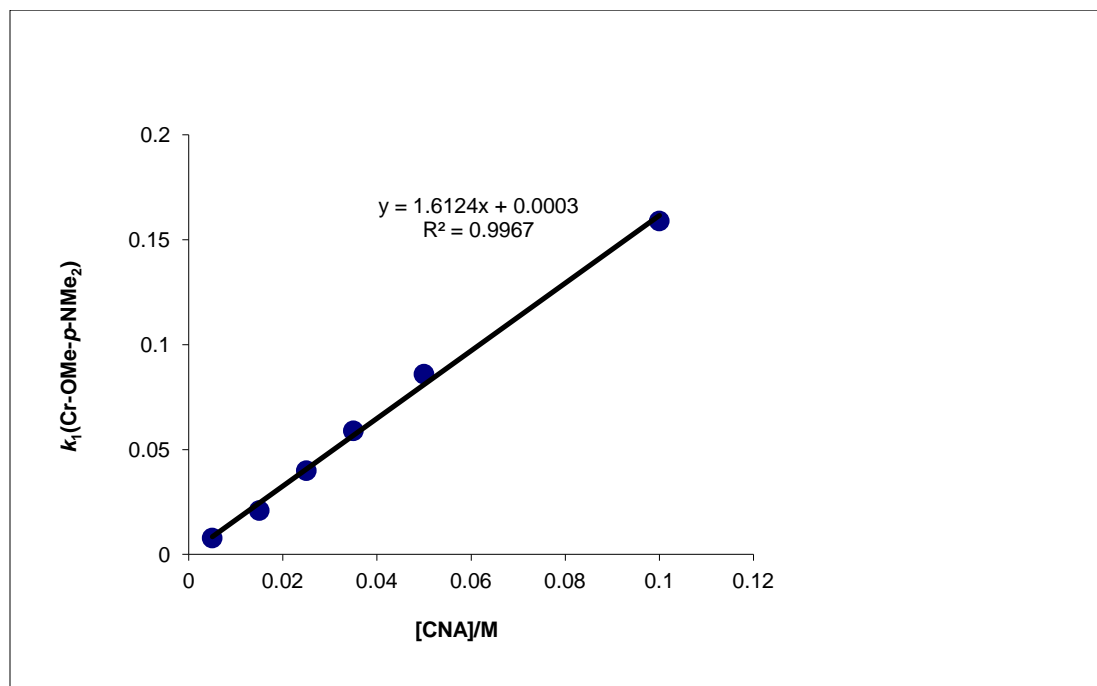

**Figure S3(a).** Plot of  $k_{\text{obs}}^1$  vs.  $[\text{N}\equiv\text{C-NH}^-]$  for the reaction between **Cr-OMe-NMe<sub>2</sub>** with **N≡C-NH<sup>-</sup>** in 50%-MeCN-50% H<sub>2</sub>O at 25 °C.

**Table S3(b).** Summary of Data for the reaction between **Cr-OMe-OMe** with  $\text{N}\equiv\text{C-NH}^-$  in 50%-MeCN-50%  $\text{H}_2\text{O}$  at 25 °C.

| [CAN]/M  | $k_{\text{obs}}^1/\text{s}^{-1}(\text{Cr-OMe-OMe})$ |
|----------|-----------------------------------------------------|
| 0.005    | 0.639                                               |
| 0.015    | 1.39                                                |
| 0.025    | 2.39                                                |
| 0.035    | 3.28                                                |
| 0.05     | 5.14                                                |
| 1.00E-01 | 8.94                                                |

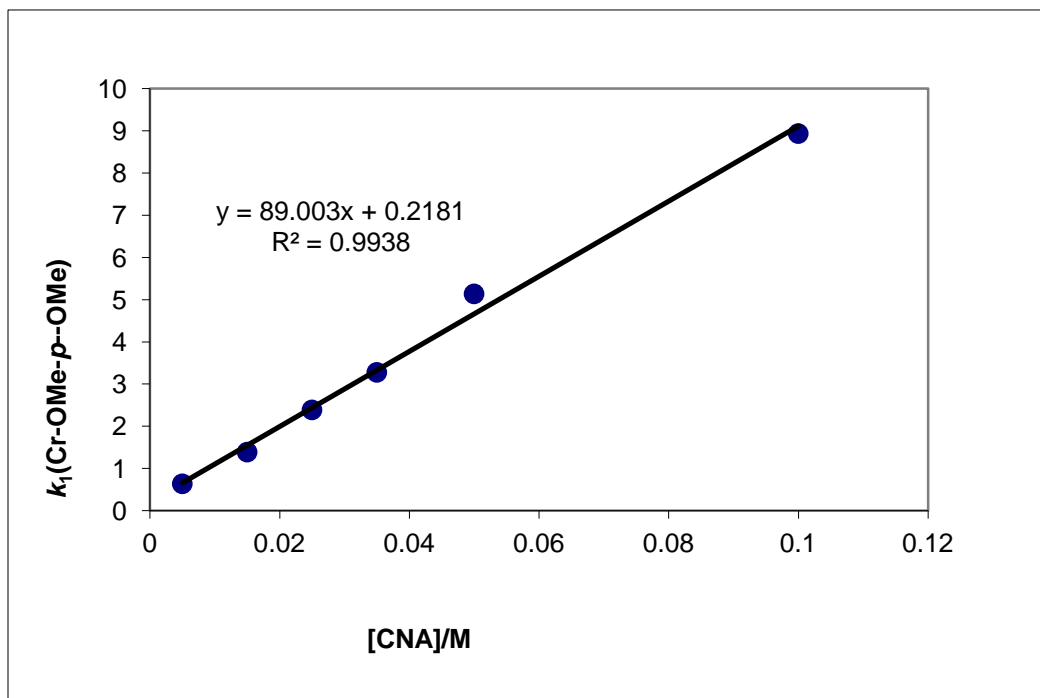

**Figure S3(b).** Plot of  $k_{\text{obs}}^1$  vs.  $[\text{N}\equiv\text{C-NH}^-]$  for the reaction between **Cr-OMe-OMe** with  $\text{N}\equiv\text{C-NH}^-$  in 50%-MeCN-50%  $\text{H}_2\text{O}$  at 25 °C.

**Table S3(c).** Summary of Data for the reaction between **Cr-OMe-H** with  $\text{N}\equiv\text{C}-\text{NH}^-$  in 50%-MeCN-50%  $\text{H}_2\text{O}$  at 25 °C.

| [CAN]/M | $k_{\text{obs}}^1/\text{s}^{-1}$ (Cr-OMe-H) |
|---------|---------------------------------------------|
| 0.025   | 16.640                                      |
| 0.035   | 23.600                                      |
| 0.050   | 28.500                                      |
| 0.063   | 36.300                                      |
| 0.075   | 39.600                                      |
| 0.088   | 49.400                                      |
| 0.100   | 58.000                                      |

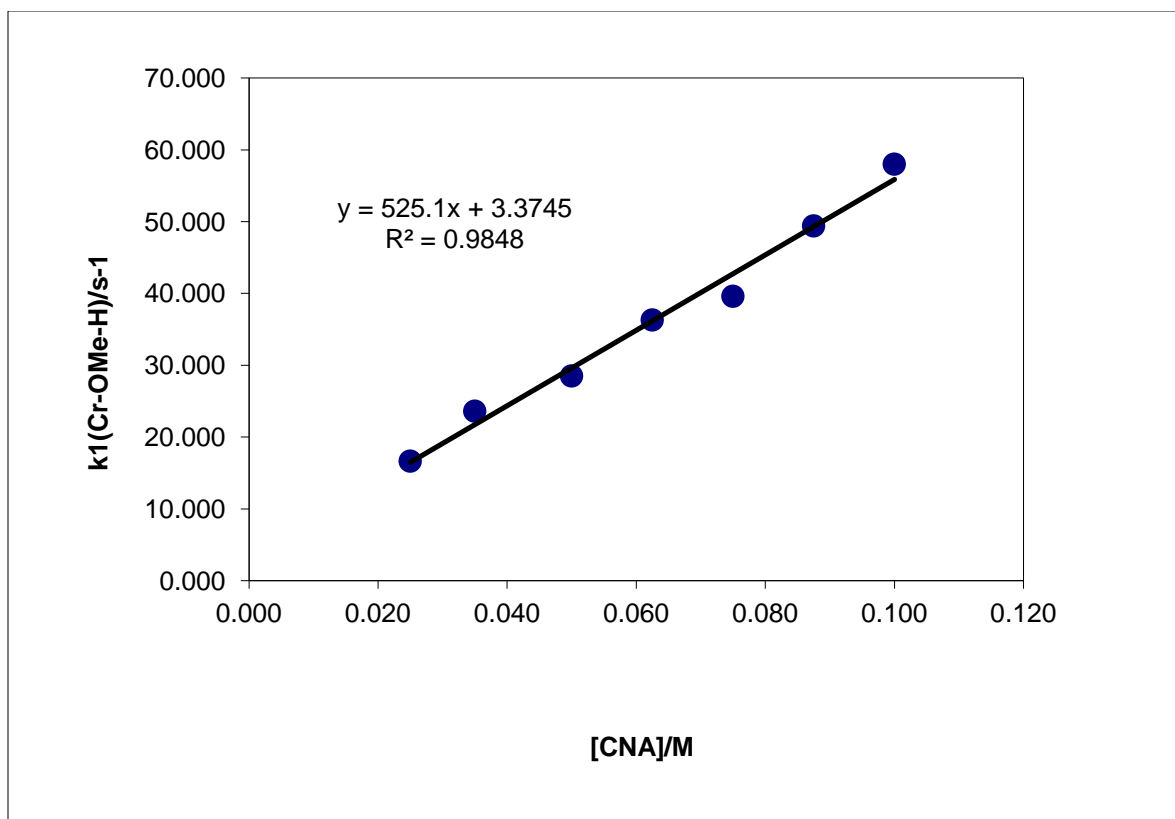

**Figure S3(c).** Plot of  $k_{\text{obs}}^1$  vs.  $[\text{N}\equiv\text{C}-\text{NH}^-]$  for the reaction between **Cr-OMe-H** with  $\text{N}\equiv\text{C}-\text{NH}^-$  in 50%-MeCN-50%  $\text{H}_2\text{O}$  at 25 °C.



**Table S3(d).** Summary of Data for the reaction between **Cr-OMe-*p*-F** with  $\text{N}\equiv\text{C-NH}^-$  in 50%-MeCN-50%  $\text{H}_2\text{O}$  at 25 °C.

| [CAN]/M | $k_{\text{obs}}^1/\text{s}^{-1}$ (Cr-OMe- <i>p</i> -F) |
|---------|--------------------------------------------------------|
| 0.01    | 9.80                                                   |
| 0.02    | 16.90                                                  |
| 0.03    | 32.80                                                  |
| 0.04    | 40.90                                                  |
| 0.05    | 55.90                                                  |
| 0.10    | 100.00                                                 |

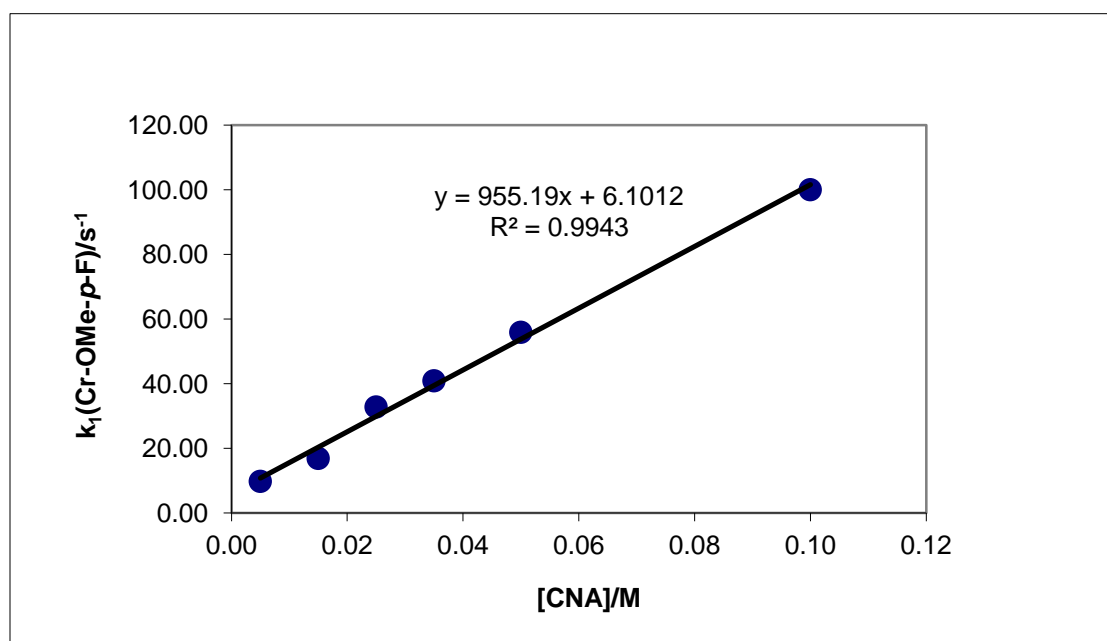

**Figure S3(d).** Plot of  $k_{\text{obs}}^1$  vs.  $[\text{N}\equiv\text{C-NH}^-]$  for the reaction between **Cr-OMe-*p*-F** with  $\text{N}\equiv\text{C-NH}^-$  in 50%-MeCN-50%  $\text{H}_2\text{O}$  at 25 °C.

**Table S3(e).** Summary of Data for the reaction between **Cr-OMe-*p*-Cl** with  $\text{N}\equiv\text{C}-\text{NH}^-$  in 50%-MeCN-50%  $\text{H}_2\text{O}$  at 25 °C

| [CAN]/M | $k_{\text{obs}}^1 / \text{s}^{-1}(\text{Cl})$ |
|---------|-----------------------------------------------|
| 0.005   | 17.8                                          |
| 0.015   | 36.9                                          |
| 0.025   | 65.0                                          |
| 0.035   | 96.0                                          |
| 0.050   | 118.0                                         |
| 0.100   | 230.0                                         |

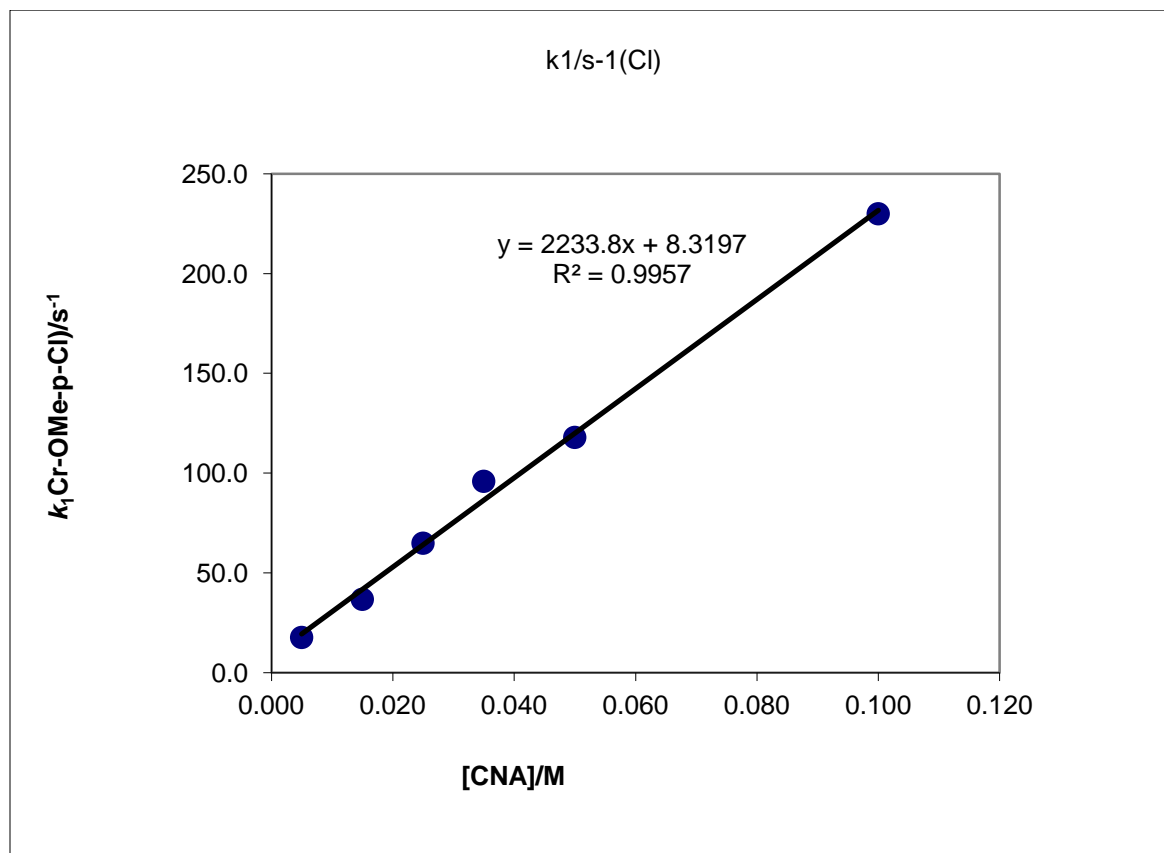

**Figure S3(e).** Plot of  $k_{\text{obs}}^1$  vs.  $[\text{N}\equiv\text{C}-\text{NH}^-]$  for the reaction between **Cr-OMe-*p*-Cl** with  $\text{N}\equiv\text{C}-\text{NH}^-$  in 50%-MeCN-50%  $\text{H}_2\text{O}$  at 25 °C.

**Table S3(f).** Summary of Data for the reaction between **Cr-OEt-H** with  $\text{N}\equiv\text{C-NH}^-$  in 50%-MeCN-50%  $\text{H}_2\text{O}$  at 25 °C

| [CAN]/M | $k_{\text{obs}}^1$ (Cr-OEt-H)/s <sup>-1</sup> |
|---------|-----------------------------------------------|
| 0.025   | 16.94                                         |
| 0.035   | 18                                            |
| 0.050   | 20.6                                          |
| 0.063   | 23.7                                          |
| 0.075   | 24.3                                          |
| 0.088   | 26.4                                          |
| 0.100   | 29.5                                          |

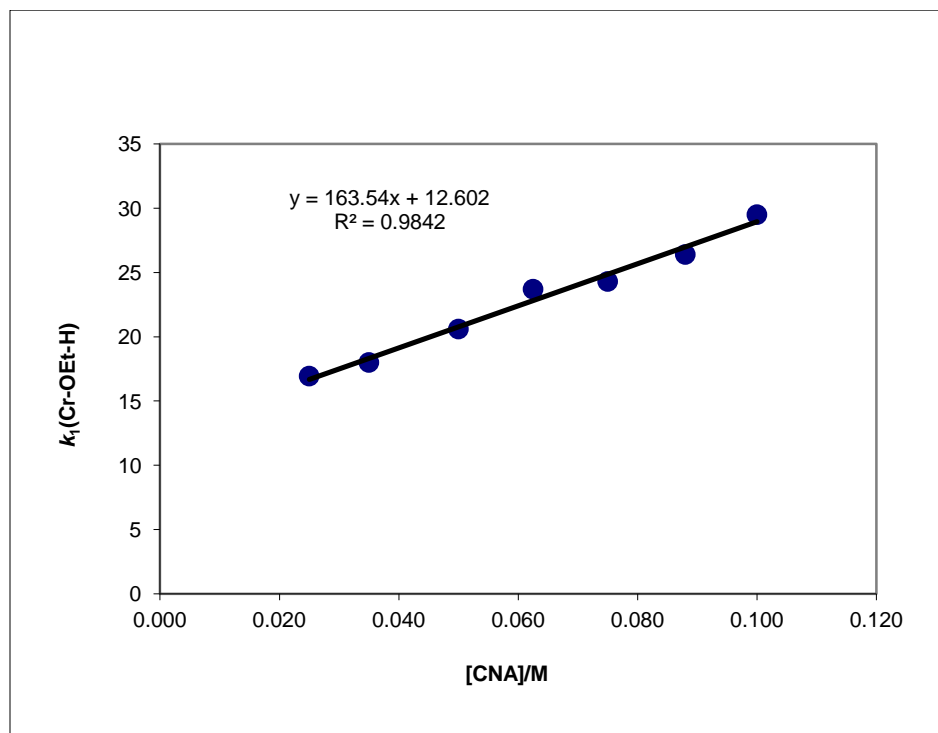

**Figure S3(f).** Plot of  $k_{\text{obs}}^1$  vs.  $[\text{N}\equiv\text{C-NH}^-]$  for the reaction between **Cr-OEt-H** with  $\text{N}\equiv\text{C-NH}^-$  in 50%-MeCN-50%  $\text{H}_2\text{O}$  at 25 °C.

**Table S3(g).** Summary of Data for the reaction between **Cr-OEt-H** with  $\text{N}\equiv\text{C-NH}^-$  in 50%-MeCN-50%  $\text{H}_2\text{O}$  at 25 °C

| [CAN]/M | $k_{\text{obs}}^{\text{II}}(\text{Cr-OEt-H})$ |
|---------|-----------------------------------------------|
| 0.0025  | 0.117                                         |
| 0.005   | 0.135                                         |
| 0.015   | 0.26                                          |
| 0.025   | 0.48                                          |
| 0.035   | 0.66                                          |
| 0.05    | 0.84                                          |
| 0.025   | 0.45                                          |
| 0.035   | 0.61                                          |
| 0.05    | 0.798                                         |

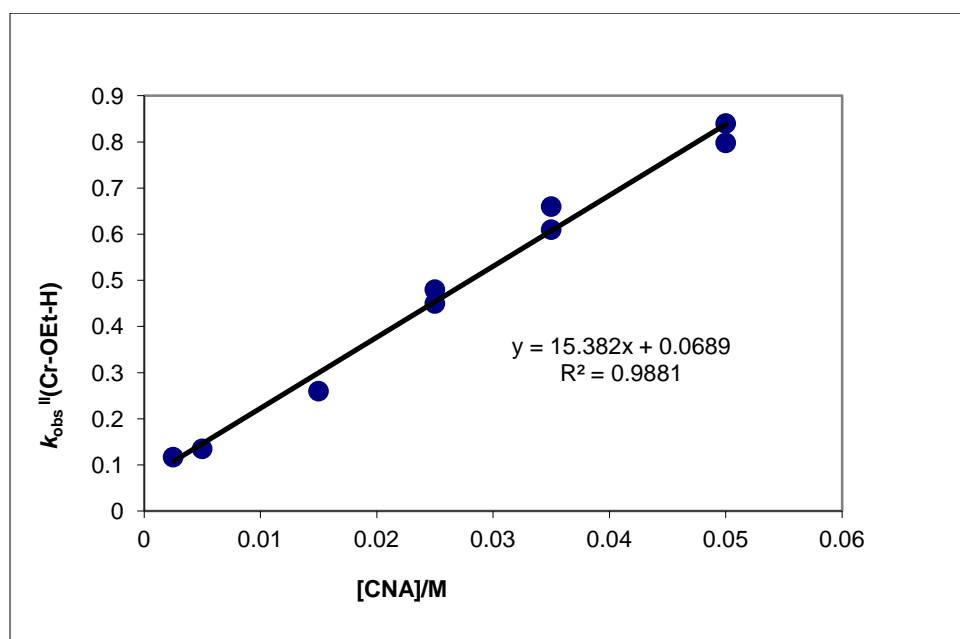

**Figure S3(g).** Plot of  $k_{\text{obs}}^{\text{II}}$  vs.  $[\text{N}\equiv\text{C-NH}^-]$  for the reaction between **Cr-OEt-H** with  $\text{N}\equiv\text{C-NH}^-$  in 50%-MeCN-50%  $\text{H}_2\text{O}$  at 25 °C.

**Table S3(h).** Summary of Data for the reaction between **W-OMe-H** with  $\text{N}\equiv\text{C-NH}^-$  in 50%-MeCN-50%  $\text{H}_2\text{O}$  at 25 °C

| [CAN]/M | $k_{\text{obs}}^1/(\text{W-OMe-H})/\text{s}^{-1}$ |
|---------|---------------------------------------------------|
| 0.025   | 38.850                                            |
| 0.035   | 51.500                                            |
| 0.050   | 71.000                                            |
| 0.063   | 76.000                                            |
| 0.075   | 89.000                                            |
| 0.088   | 104.000                                           |
| 0.100   | 112.000                                           |

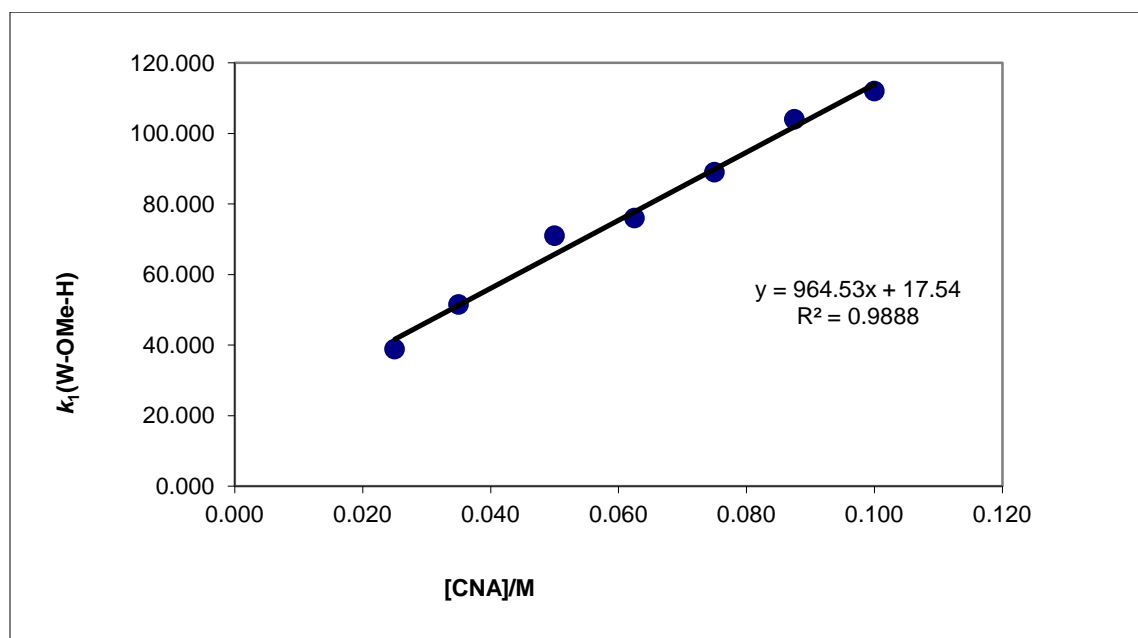

**Figure S3(h).** Plot of  $k_{\text{obs}}^1$  vs.  $[\text{N}\equiv\text{C-NH}^-]$  for the reaction between **W-OMe-H** with  $\text{N}\equiv\text{C-NH}^-$  in 50%-MeCN-50%  $\text{H}_2\text{O}$  at 25 °C.

**Table S3(i).** Summary of Data for the reaction between **W-OMe-H** with  $\text{N}\equiv\text{C}-\text{NH}^-$  in 50%-MeCN-50%  $\text{H}_2\text{O}$  at 25 °C

| [CAN]/M | $k_{\text{obs}}^{\text{II}}/(\text{W-OMe-H})$ |
|---------|-----------------------------------------------|
| 0.025   | 6.090                                         |
| 0.035   | 8.500                                         |
| 0.050   | 10.900                                        |
| 0.063   | 15.000                                        |
| 0.075   | 17.000                                        |
| 0.088   | 19.400                                        |
| 0.100   | 22.000                                        |

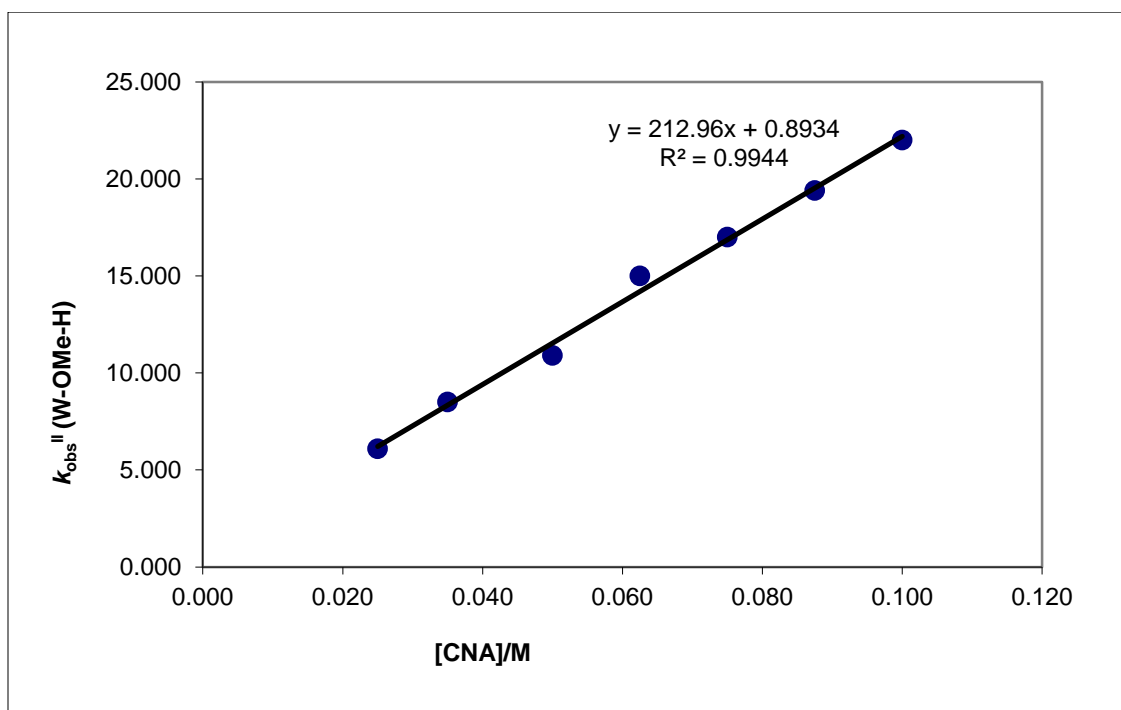

**Figure S3(i).** Plot of  $k_{\text{obs}}^{\text{II}}$  vs.  $[\text{N}\equiv\text{C}-\text{NH}^-]$  for the reaction between **W-OMe-H** with  $\text{N}\equiv\text{C}-\text{NH}^-$  in 50%-MeCN-50%  $\text{H}_2\text{O}$  at 25 °C.

**Table S3(j).** Summary of Data for the reaction between **W-OEt-H** with  $\text{N}\equiv\text{C-NH}^-$  in 50%-MeCN-50%  $\text{H}_2\text{O}$  at 25 °C

| [CAN]/M | $k_{\text{obs}}^1$ / <b>W-OEt-H</b> |
|---------|-------------------------------------|
| 0.01    | 42                                  |
| 0.015   | 46                                  |
| 0.025   | 56                                  |
| 0.035   | 61.6                                |
| 0.05    | 75                                  |

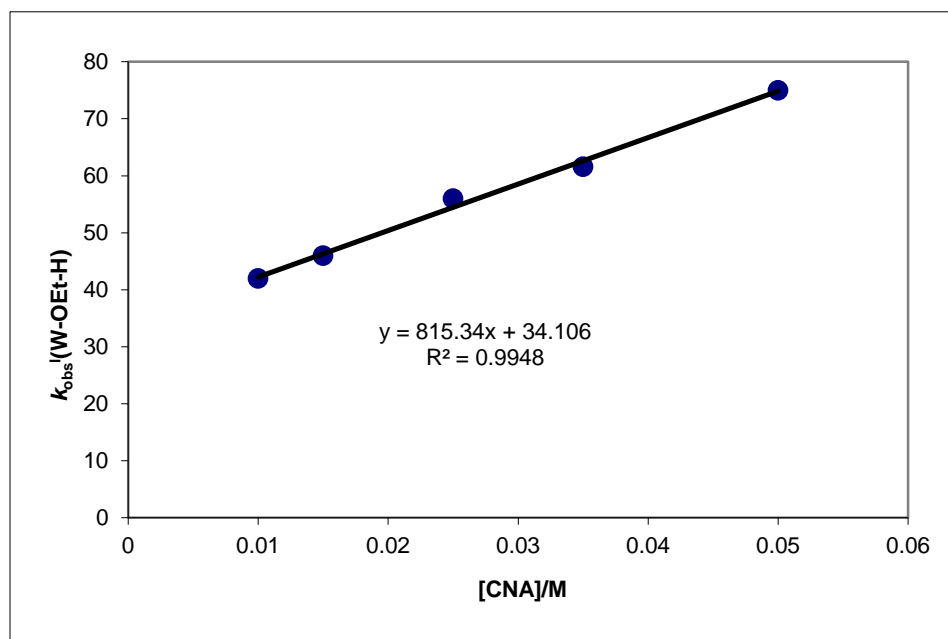

**Figure S3(j).** Plot of  $k_{\text{obs}}^1$  vs.  $[\text{N}\equiv\text{C-NH}^-]$  for the reaction between **W-OEt-H** with  $\text{N}\equiv\text{C-NH}^-$  in 50%-MeCN-50%  $\text{H}_2\text{O}$  at 25 °C.

**Table S3(k).** Summary of Data for the reaction between **W-OEt-H** with  $\text{N}\equiv\text{C-NH}^-$  in 50%-MeCN-50%  $\text{H}_2\text{O}$  at 25 °C

| [CAN]/M | $k_{\text{obs}}^{\text{II}}/\text{W-OEt-H}$ |
|---------|---------------------------------------------|
| 0.0025  | 0.137                                       |
| 0.005   | 0.22                                        |
| 0.015   | 0.58                                        |
| 0.025   | 0.889                                       |
| 0.035   | 1.29                                        |

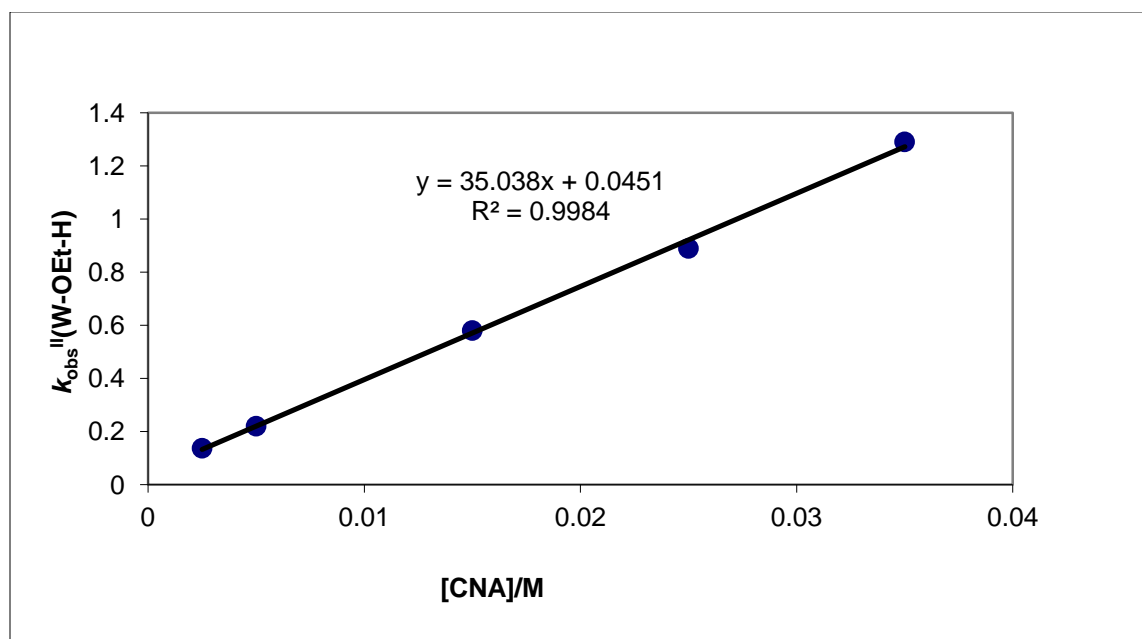

**Figure S3(k).** Plot of  $k_{\text{obs}}^{\text{II}}$  vs.  $[\text{N}\equiv\text{C-NH}^-]$  for the reaction between **W-OEt-H** with  $\text{N}\equiv\text{C-NH}^-$  in 50%-MeCN-50%  $\text{H}_2\text{O}$  at 25 °C.



**Table S3(I).** Summary of substituent constants and rate constants ( $k_1$ ) for the reactions of  $\text{N}\equiv\text{C-NH}^-$  with **Cr-OMe-Z** in 50% MeCN-50% Water (v/v) at 25 °C

|      |       |      |         |
|------|-------|------|---------|
| Cl   | 0.23  | 3.35 | 2234.00 |
| F    | 0.06  | 2.98 | 955.20  |
| H    | 0     | 2.72 | 525.10  |
| Me   | -0.17 |      |         |
| OMe  | -0.27 | 1.95 | 89.27   |
| NMe2 | -0.83 | 0.21 | 1.61    |
| SPW  |       |      |         |

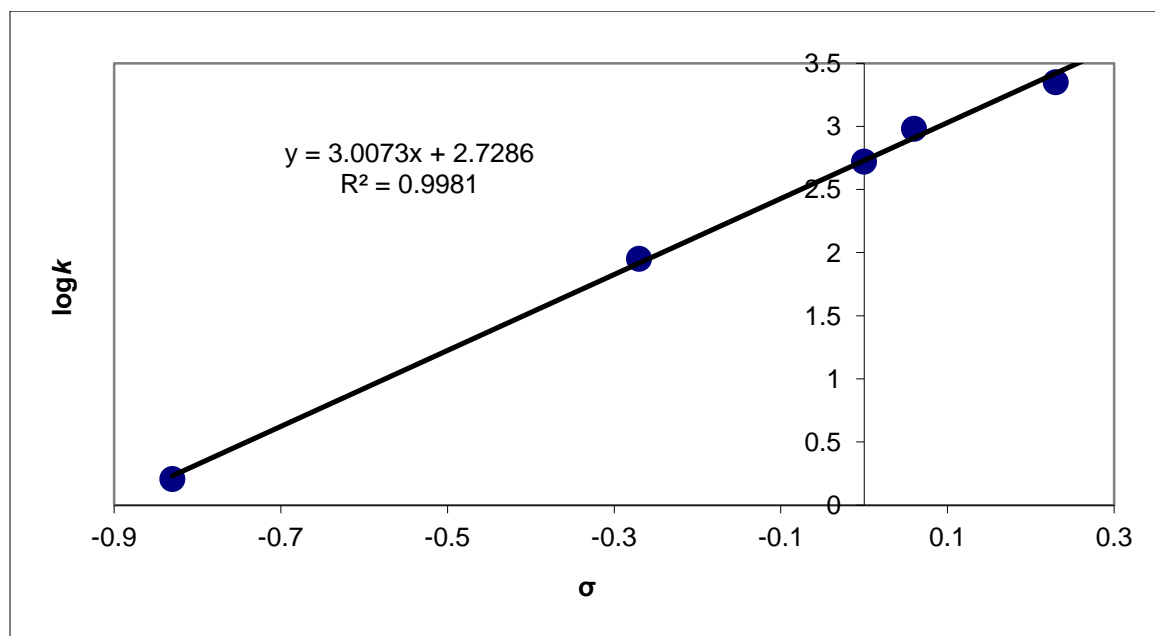

**Figure S3(I)** . Hammett plot of  $k_1(\text{M}^{-1}\text{s}^{-1})$  for the reactions of  $\text{N}\equiv\text{C-NH}^-$  with **Cr-OMe-Z** in 50% MeCN-50% Water (v/v) at 25 °C

**Table S3(m).** Summary of Data for the reaction between **W-OEt-H** with  $\text{N}\equiv\text{C-NH}^-$  in 50%-MeCN-50%  $\text{H}_2\text{O}$  at 25 °C

| [CAN]/M | $k_{\text{obs}}^{\text{II}}/\text{s}^{-1}(\text{F})$ |
|---------|------------------------------------------------------|
| 0.01    | 0.90                                                 |
| 0.02    | 1.68                                                 |
| 0.03    | 3.60                                                 |
| 0.04    | 4.50                                                 |
| 0.05    | 7.60                                                 |
| 0.10    | 15.20                                                |

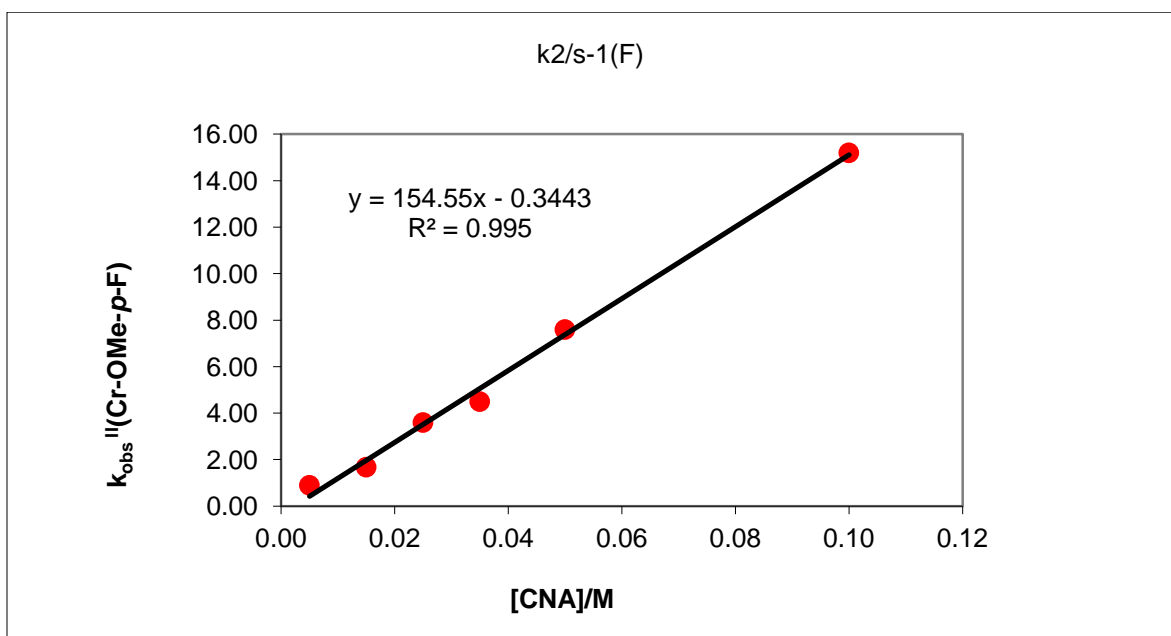

**Figure S3(m).** Plot of  $k_{\text{obs}}^{\text{II}}$  vs.  $[\text{N}\equiv\text{C-NH}^-]$  for the reaction between **Cr-OMe-p-F** with  $\text{N}\equiv\text{C-NH}^-$  in 50%-MeCN-50%  $\text{H}_2\text{O}$  at 25 °C.

**Table S3(n).** Summary of Data for the reaction between **W-OEt-H** with  $\text{N}\equiv\text{C}-\text{NH}^-$  in 50%-MeCN-50%  $\text{H}_2\text{O}$  at 25 °C

| [CAN]/M | $k_{\text{obs}}^{\text{II}}/\text{s}^{-1}(\text{Cl!})$ |
|---------|--------------------------------------------------------|
| 0.01    | 1.85                                                   |
| 0.02    | 4.68                                                   |
| 0.03    | 6.72                                                   |
| 0.04    | 10.20                                                  |
| 0.05    | 15.90                                                  |
| 0.10    | 30.90                                                  |

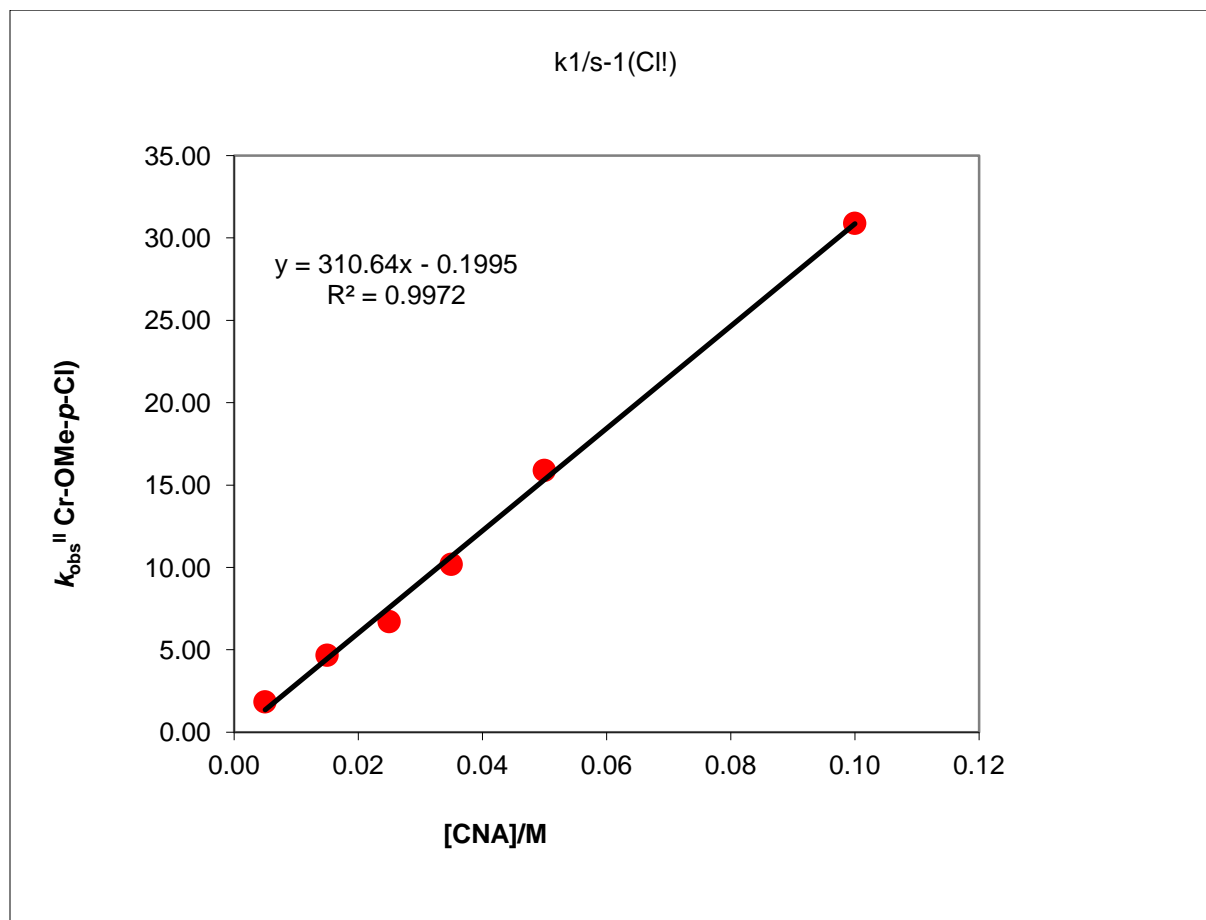

**Figure S3(n).** Plot of  $k_{\text{obs}}^{\text{II}}$  vs.  $[\text{N}\equiv\text{C}-\text{NH}^-]$  for the reaction between **Cr-OMe-p-Cl** with  $\text{N}\equiv\text{C}-\text{NH}^-$  in 50%-MeCN-50%  $\text{H}_2\text{O}$  at 25 °C.

**Table S3(o).** Summary of Data for the reaction between **Cr-OMe-H** with  $\text{N}\equiv\text{C-NH}^-$  in 50%-MeCN-50%  $\text{H}_2\text{O}$  at 25 °C

| [CAN]/M | $k_{\text{obs}}^{\text{II}}$ /s <sup>-1</sup> (Cr-OMe-H) |
|---------|----------------------------------------------------------|
| 0.03    | 3.10                                                     |
| 0.04    | 4.50                                                     |
| 0.05    | 6.70                                                     |
| 0.06    | 8.26                                                     |
| 0.08    | 8.80                                                     |
| 0.09    | 10.29                                                    |
| 0.10    | 11.89                                                    |

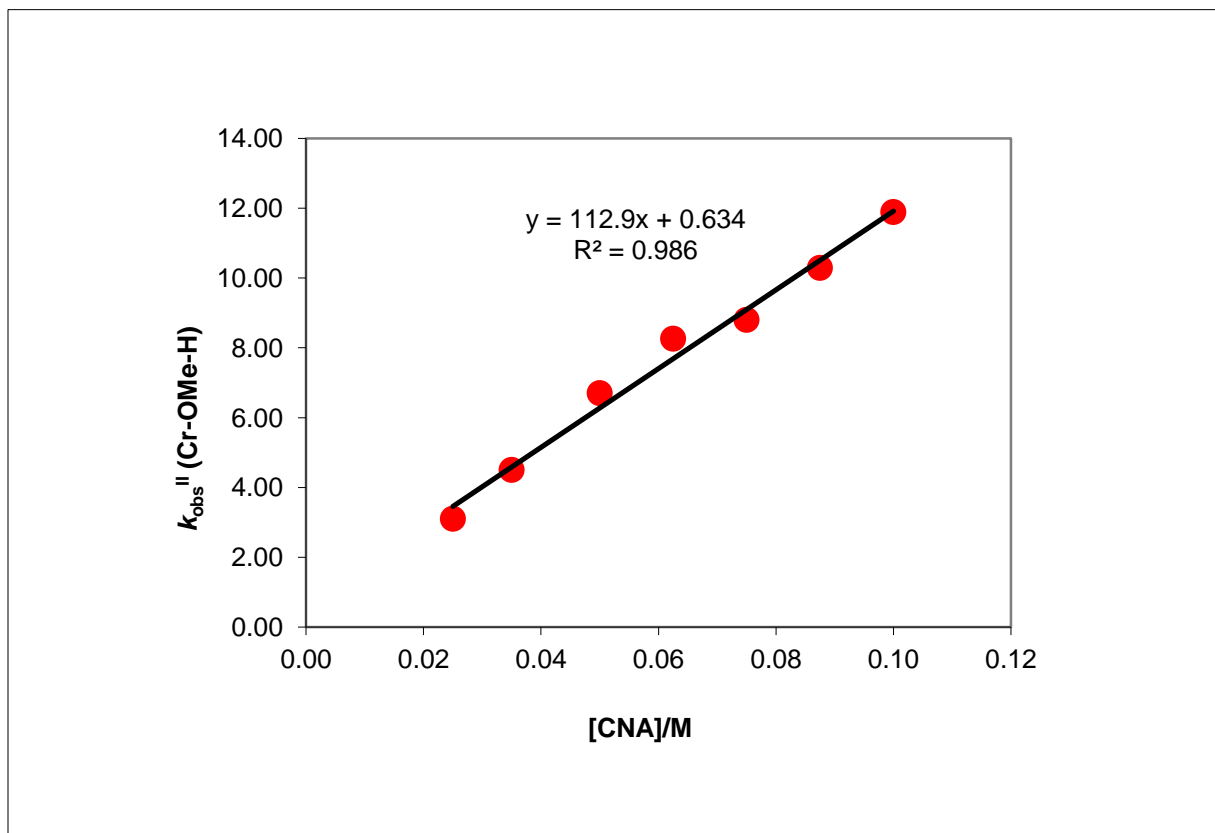

**Figure S3(o).** Plot of  $k_{\text{obs}}^{\text{II}}$  vs.  $[\text{N}\equiv\text{C-NH}^-]$  for the reaction between **Cr-OMe-H** with  $\text{N}\equiv\text{C-NH}^-$  in 50%-MeCN-50%  $\text{H}_2\text{O}$  at 25 °C.

**Table S3(p).** Summary of Data for the reaction between **Cr-OMe-*p*-OMe** with  $\text{N}\equiv\text{C}-\text{NH}^-$  in 50%-MeCN-50%  $\text{H}_2\text{O}$  at 25 °C

| [CAN]/M | $k_{\text{obs}}^{\text{II}} / \text{s}^{-1}$ (Cr-OMe-OMe) |
|---------|-----------------------------------------------------------|
| 0.01    | 0.02                                                      |
| 0.02    | 0.17                                                      |
| 0.03    | 0.22                                                      |
| 0.04    | 0.39                                                      |
| 0.05    | 0.52                                                      |
| 0.08    | 0.80                                                      |

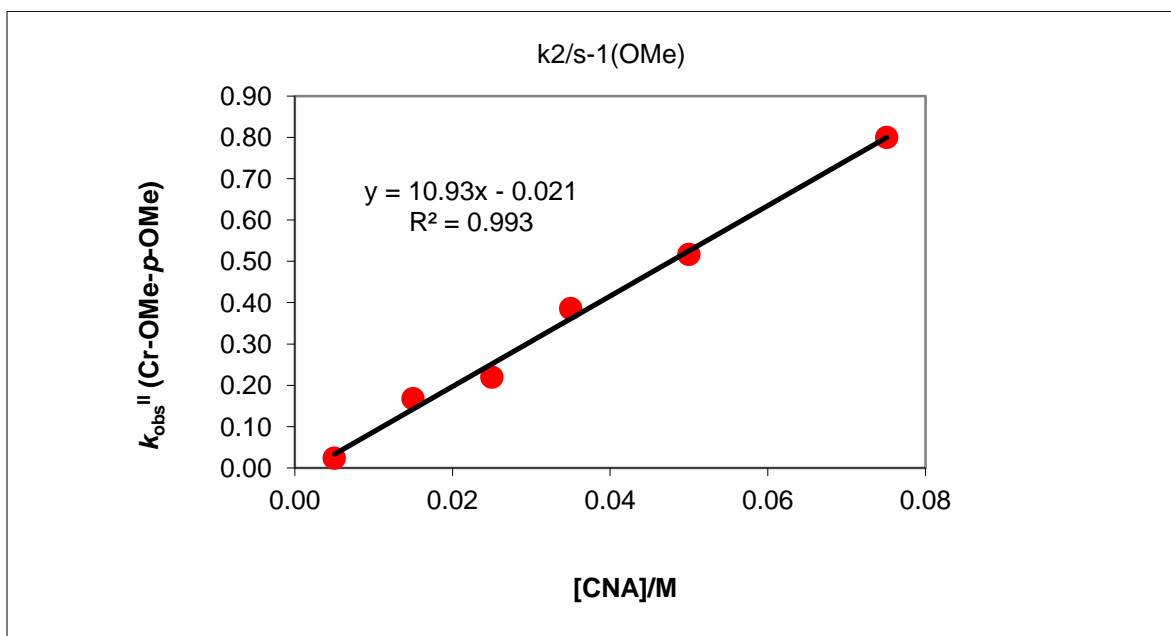

**Figure S3(p).** Plot of  $k_{\text{obs}}^{\text{II}}$  vs.  $[\text{N}\equiv\text{C}-\text{NH}^-]$  for the reaction between **Cr-OMe-*p*-OMe** with  $\text{N}\equiv\text{C}-\text{NH}^-$  in 50%-MeCN-50%  $\text{H}_2\text{O}$  at 25 °C

**Table S3(q).** Summary of substituent constants and rate constants ( $k_2$ ) for the reactions of  $\text{N}\equiv\text{C-NH}^-$  with **Cr-OMe-Z** in 50% MeCN-50% Water (v/v) at 25 °C

|     | $\sigma$ | $\log(k_2)$ | $k_2/\text{M}^{-1}\text{s}^{-1}$ |
|-----|----------|-------------|----------------------------------|
| Cl  | 0.23     | 2.492       | 310.64                           |
| F   | 0.06     | 2.189       | 154.55                           |
| H   | 0        | 2.053       | 112.90                           |
| OMe | -0.27    | 1.039       | 10.93                            |

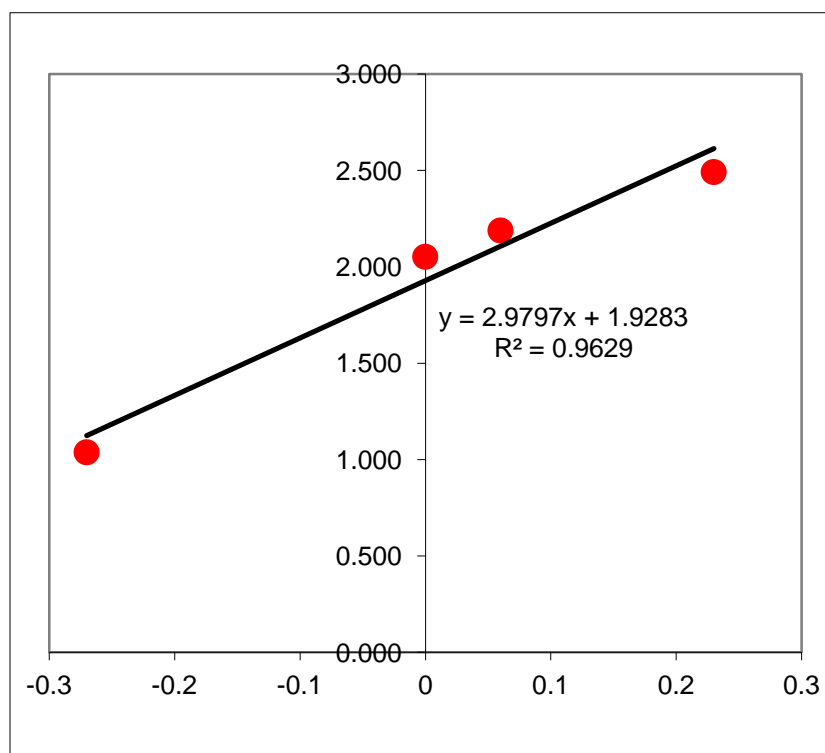

**Figure S3(q)** . Hammett plot of  $k_2$  ( $\text{M}^{-1}\text{s}^{-1}$ ) for the reactions of  $\text{N}\equiv\text{C-NH}^-$  with **Cr-OMe-Z** in 50% MeCN-50% Water (v/v) at 25 °C

**Table S4(a).** Summary of Data for the reaction between **Cr-SMe-*p*-NMe<sub>2</sub>** with  $\text{N}\equiv\text{C-NH}^-$  in 50%-MeCN-50% H<sub>2</sub>O at 25 °C.

| [CAN]/M | $k_{\text{obs}}^1/\text{s}^{-1}$ |
|---------|----------------------------------|
| 0.025   | 0.043                            |
| 0.035   | 0.059                            |
| 0.050   |                                  |
| 0.063   | 0.105                            |
| 0.075   | 0.125                            |
| 0.088   | 0.144                            |
| 0.100   | 0.167                            |

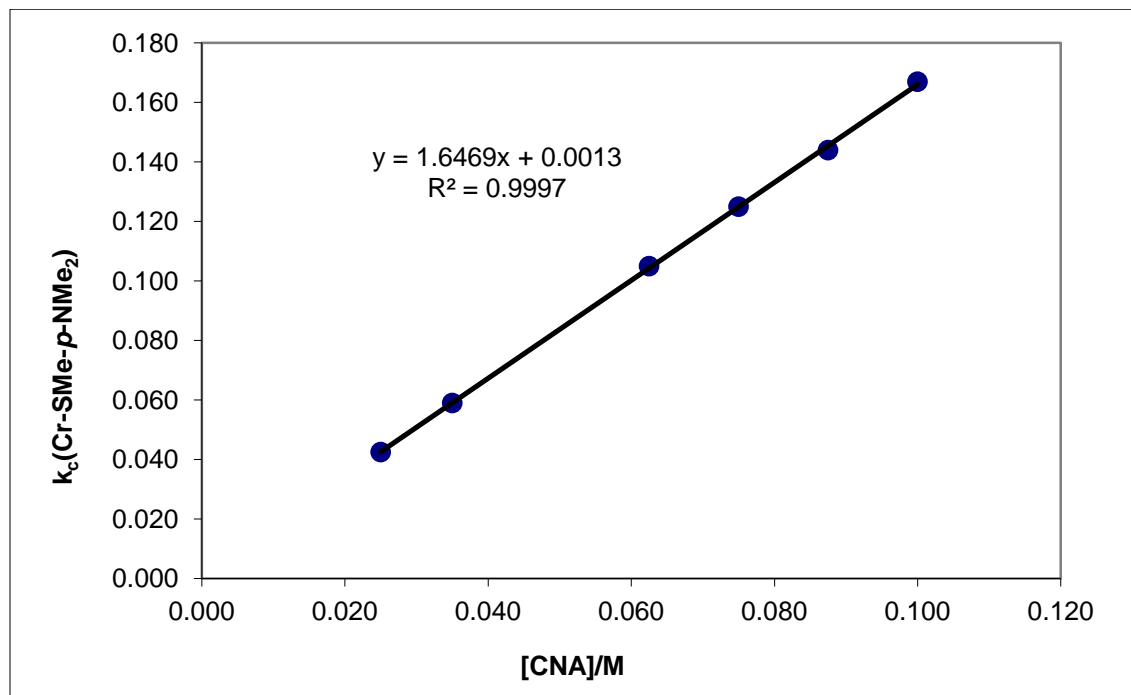

**Figure S4(a).** Plot of  $k_{\text{obs}}^1$  vs.  $[\text{N}\equiv\text{C-NH}^-]$  for the reaction between **Cr-SMe-*p*-NMe<sub>2</sub>** with  $\text{N}\equiv\text{C-NH}^-$  in 50%-MeCN-50% H<sub>2</sub>O at 25 °C.

**Table S4(b).** Summary of Data for the reaction between **Cr-SMe-p-OMe** with  $\text{N}\equiv\text{C-NH}^-$  in 50%-MeCN-50%  $\text{H}_2\text{O}$  at 25 °C.

| [CAN]/M | $k_{\text{obs}}^1/\text{s}^{-1}$ |
|---------|----------------------------------|
| 0.025   | 0.220                            |
| 0.035   | 0.290                            |
| 0.050   |                                  |
| 0.063   | 0.385                            |
| 0.075   | 0.485                            |
| 0.088   | 0.547                            |
| 0.100   | 0.600                            |

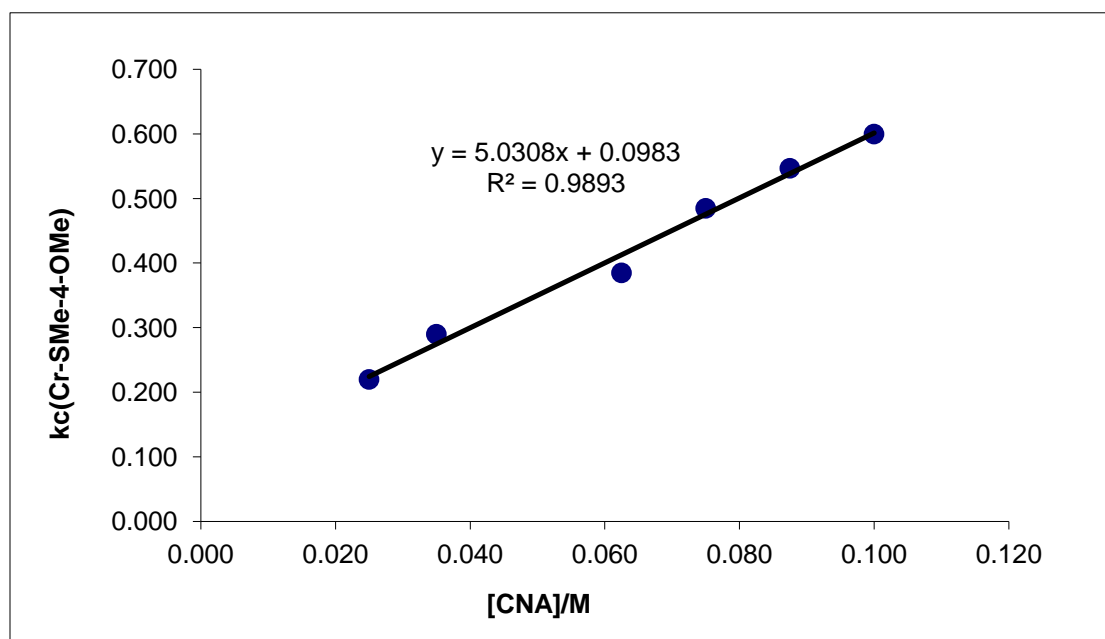

**Figure S4(b).** Plot of  $k_{\text{obs}}^1$  vs.  $[\text{N}\equiv\text{C-NH}^-]$  for the reaction between **Cr-SMe-p-OMe** with  $\text{N}\equiv\text{C-NH}^-$  in 50%-MeCN-50%  $\text{H}_2\text{O}$  at 25 °C.



**Table S4(c).** Summary of Data for the reaction between **Cr-SMe-p-Me** with  $\text{N}\equiv\text{C-NH}^-$  in 50%-MeCN-50%  $\text{H}_2\text{O}$  at 25 °C.

| [CAN]/M | $k_{\text{obs}}^1/\text{s}^{-1}$ |
|---------|----------------------------------|
| 0.025   | 0.260                            |
| 0.035   | 0.335                            |
| 0.050   |                                  |
| 0.063   | 0.519                            |
| 0.075   | 0.592                            |
| 0.088   | 0.675                            |
| 0.100   | 0.768                            |

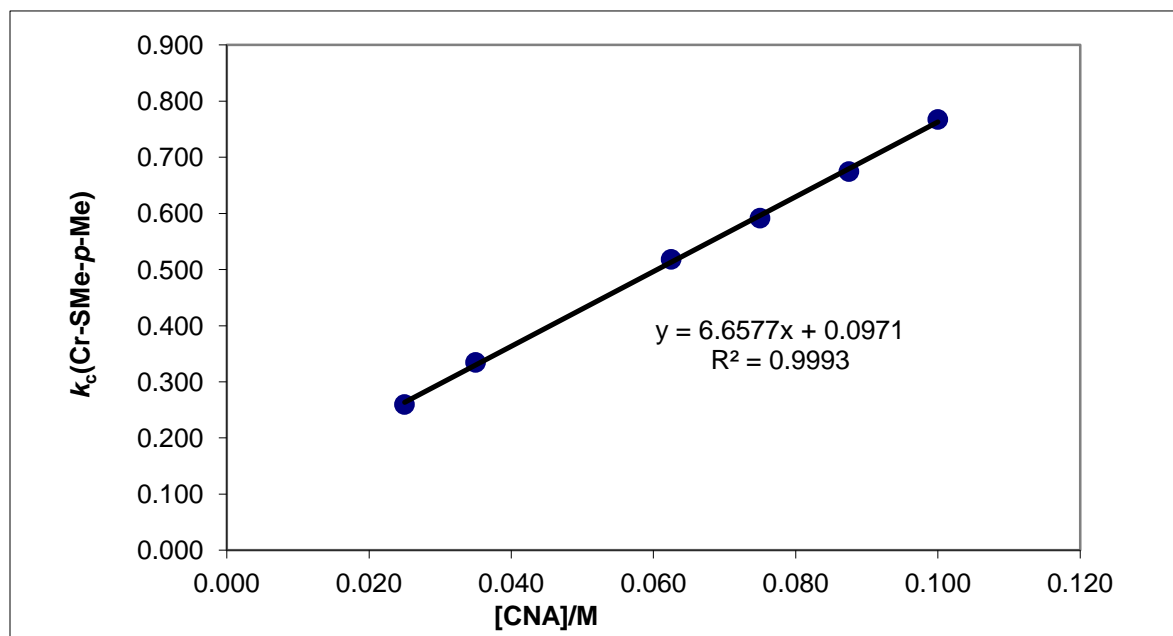

**Figure S4(c).** Plot of  $k_{\text{obs}}^1$  vs.  $[\text{N}\equiv\text{C-NH}^-]$  for the reaction between **Cr-SMe-p-Me** with  $\text{N}\equiv\text{C-NH}^-$  in 50%-MeCN-50%  $\text{H}_2\text{O}$  at 25 °C.

**Table S4(d).** Summary of Data for the reaction between **Cr-SMe-H** with  $\text{N}\equiv\text{C-NH}^-$  in 50%-MeCN-50%  $\text{H}_2\text{O}$  at 25 °C.

| [CAN]/M | $k_{\text{obs}}^1/\text{s}^{-1}$ |
|---------|----------------------------------|
| 0.0025  | 0.039                            |
| 0.005   | 0.0685                           |
| 0.015   | 0.169                            |
| 0.025   | 0.265                            |
| 0.035   | 0.345                            |
| 0.05    | 0.485                            |

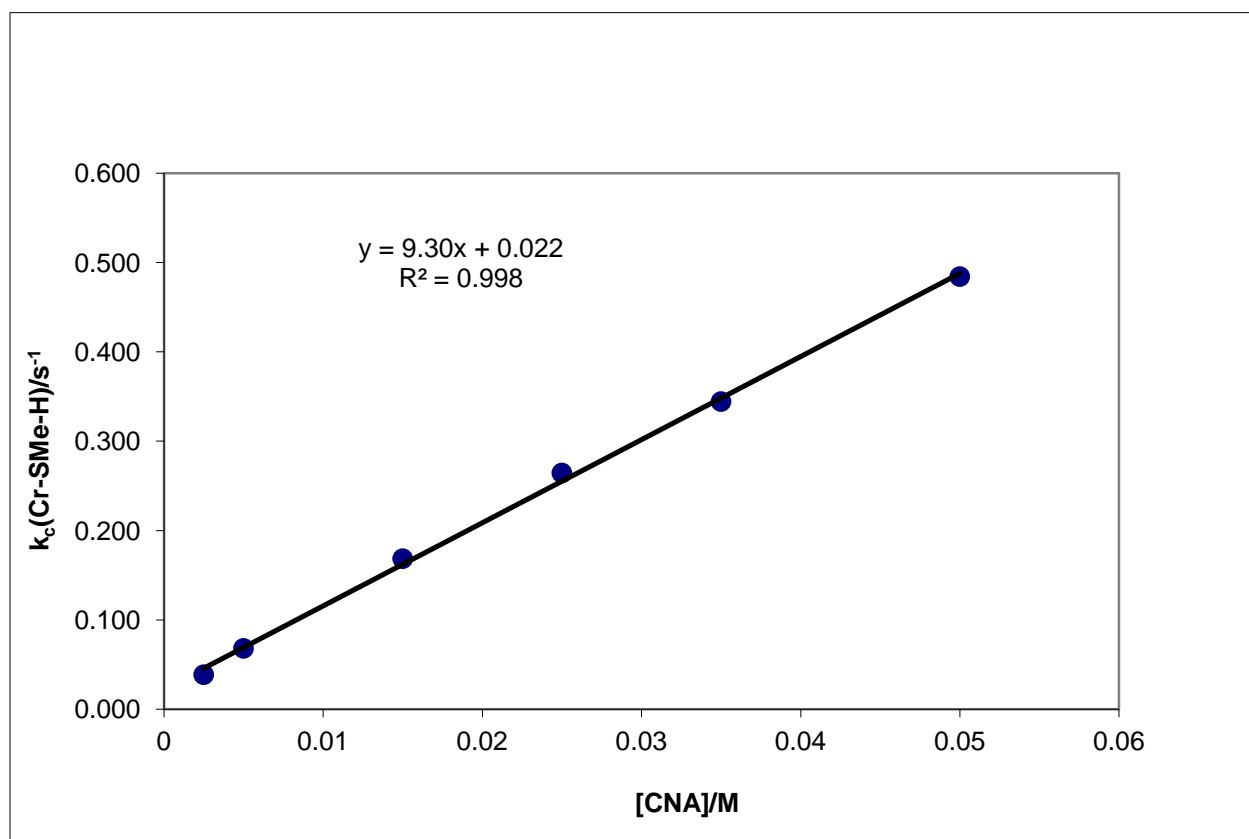

**Figure S4(d).** Plot of  $k_{\text{obs}}^1$  vs.  $[\text{N}\equiv\text{C-NH}^-]$  for the reaction between **Cr-SMe-H** with  $\text{N}\equiv\text{C-NH}^-$  in 50%-MeCN-50%  $\text{H}_2\text{O}$  at 25 °C.

**Table S4(e).** Summary of Data for the reaction between **W-SMe-H** with  $\text{N}\equiv\text{C-NH}^-$  in 50%-MeCN-50%  $\text{H}_2\text{O}$  at 25 °C.

| [CAN]/M | $k_{\text{obs}}^1/\text{s}^{-1}$ |
|---------|----------------------------------|
| 0.0025  | 0.148                            |
| 0.005   | 0.265                            |
| 0.015   | 0.679                            |
| 0.025   | 1.073                            |
| 0.035   | 1.446                            |
| 0.05    | 2.035                            |

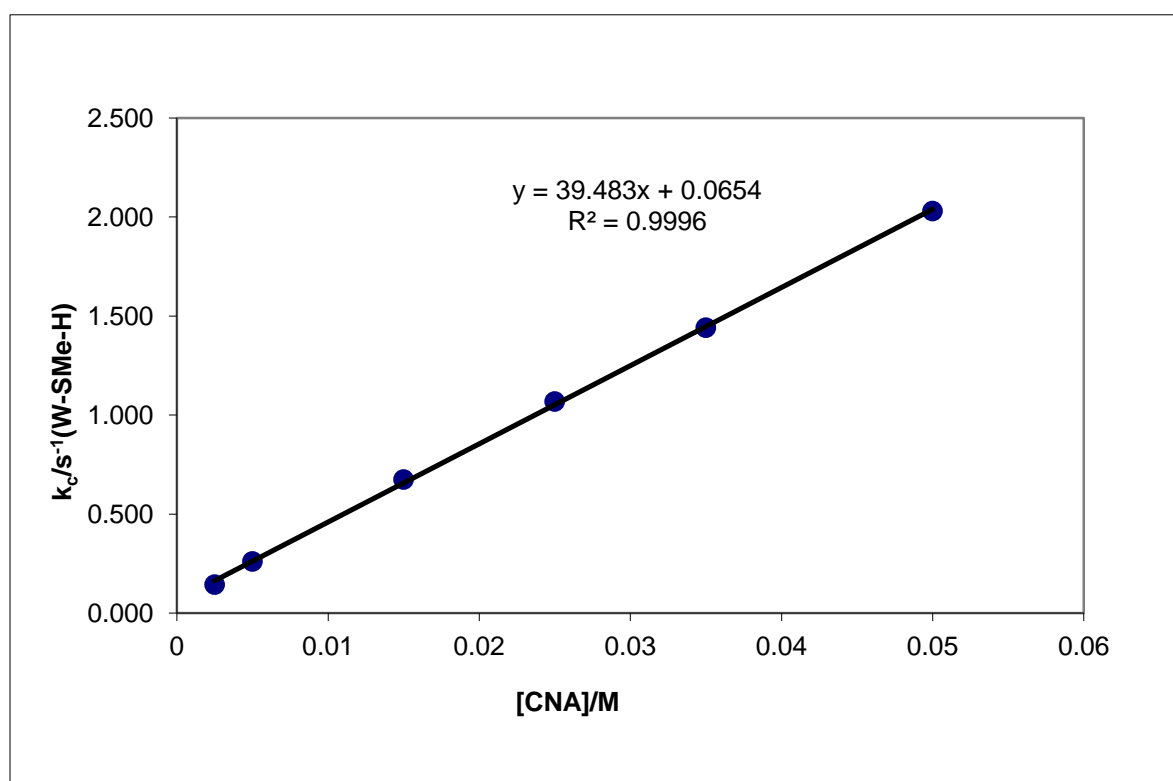

**Figure S4(e).** Plot of  $k_{\text{obs}}^1$  vs.  $[\text{N}\equiv\text{C-NH}^-]$  for the reaction between **W-SMe-H** with  $\text{N}\equiv\text{C-NH}^-$  in 50%-MeCN-50%  $\text{H}_2\text{O}$  at 25 °C.

**Table S4(f).** Summary of Data for the reaction between Cr-SMe-*p*-F with N≡C-NH<sup>-</sup> in 50%-MeCN-50% H<sub>2</sub>O at 25 °C.

| [CAN]/M | $k_{\text{obs}}^1 / \text{s}^{-1}$ |
|---------|------------------------------------|
| 0.025   | 0.367                              |
| 0.035   | 0.469                              |
| 0.050   | 0.762                              |
| 0.063   | 0.932                              |
| 0.075   | 1.155                              |
| 0.088   | 1.332                              |
| 0.100   | 1.600                              |

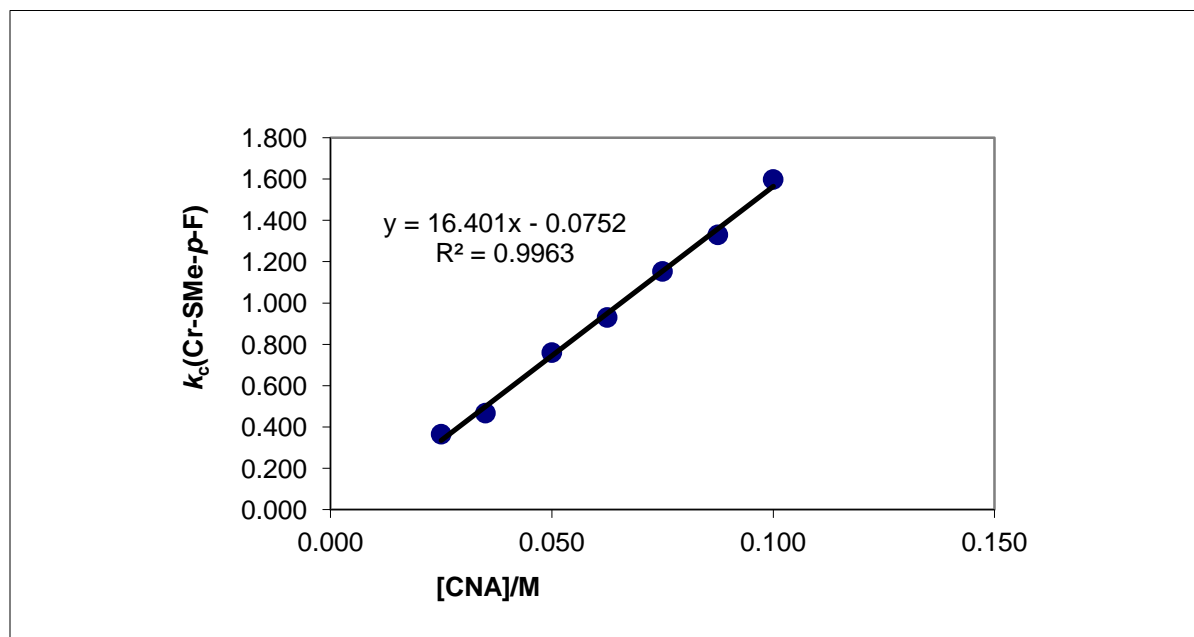

**Figure S4(f).** Plot of  $k_{\text{obs}}^1$  vs. [N≡C-NH<sup>-</sup>] for the reaction between Cr-SMe-*p*-F with N≡C-NH<sup>-</sup> in 50%-MeCN-50% H<sub>2</sub>O at 25 °C.

**Table S4(g).** Summary of Data for the reaction between **Cr-SMe-*m*-Cl** with  $\text{N}\equiv\text{C-NH}^-$  in 50%-MeCN-50%  $\text{H}_2\text{O}$  at 25 °C.

| [CAN]/M | $k_{\text{obs}}^1 / \text{s}^{-1}$ |
|---------|------------------------------------|
| 0.025   | 0.685                              |
| 0.035   | 0.850                              |
| 0.050   |                                    |
| 0.063   | 1.420                              |
| 0.075   | 1.610                              |
| 0.088   | 1.920                              |
| 0.100   | 2.200                              |

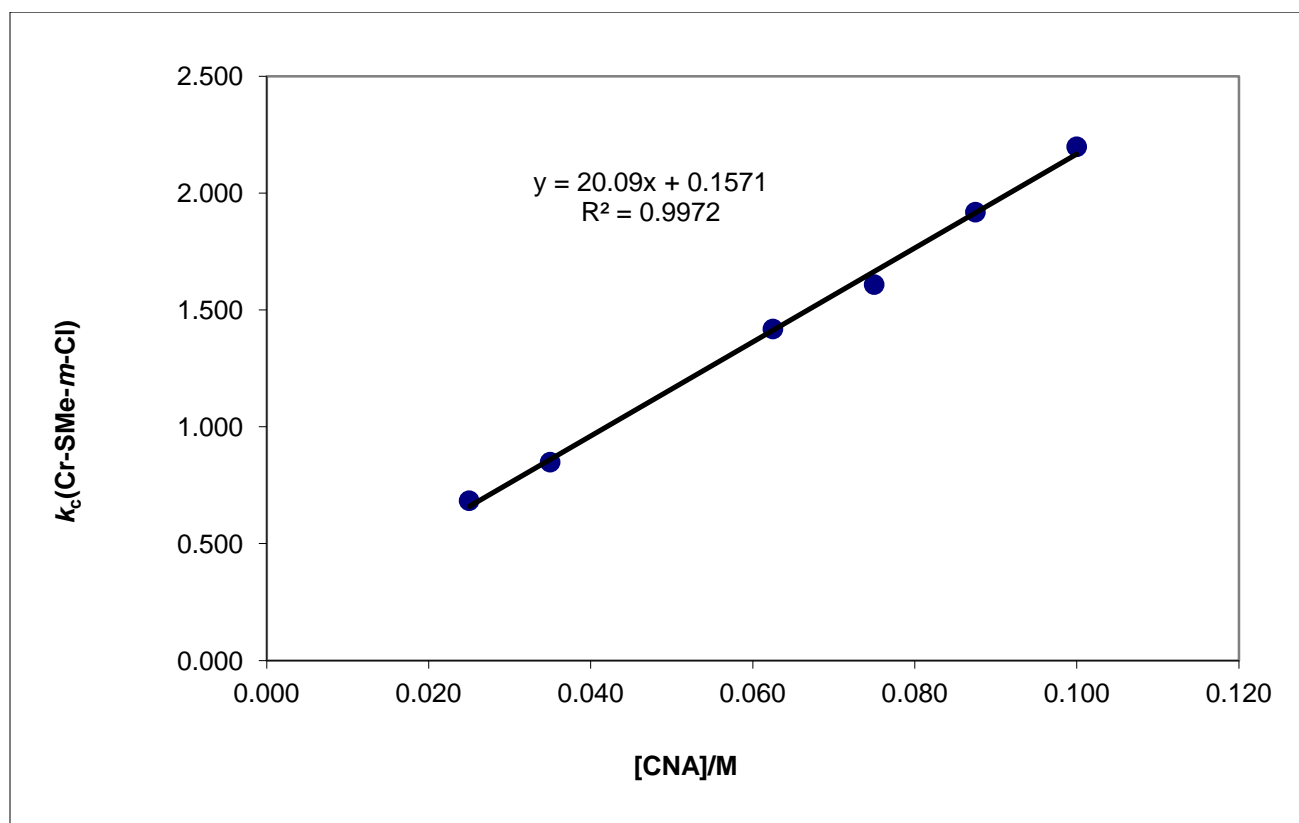

**Figure S4(g).** Plot of  $k_{\text{obs}}^1$  vs.  $[\text{N}\equiv\text{C-NH}^-]$  for the reaction between **Cr-SMe-*m*-Cl** with  $\text{N}\equiv\text{C-NH}^-$  in 50%-MeCN-50%  $\text{H}_2\text{O}$  at 25 °C.

**Table S4(h).** Summary of Data for the reaction between Cr-SMe-*p*-Cl with N≡C-NH<sup>-</sup> in 50%-MeCN-50% H<sub>2</sub>O at 25 °C.

| [CAN]/M | $k_{\text{obs}}^1/\text{s}^{-1}$ |
|---------|----------------------------------|
| 0.025   | 0.578                            |
| 0.035   | 0.769                            |
| 0.050   | 1.091                            |
| 0.063   | 1.179                            |
| 0.075   | 1.440                            |
| 0.088   | 1.640                            |
| 0.100   | 1.920                            |

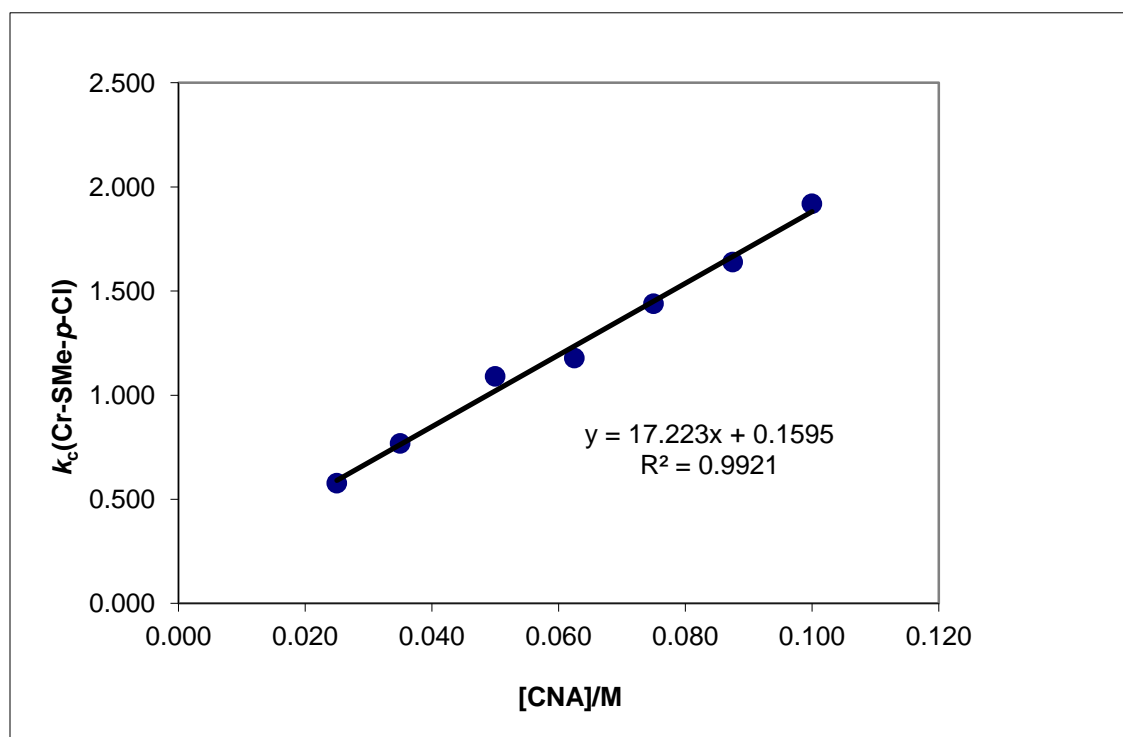

**Figure S4(h).** Plot of  $k_{\text{obs}}^1$  vs. [N≡C-NH<sup>-</sup>] for the reaction between Cr-SMe-*p*-Cl with N≡C-NH<sup>-</sup> in 50%-MeCN-50% H<sub>2</sub>O at 25 °C.

**Table S4(i).** Summary of Data for the reaction between **Cr-SMe-*p*-CF<sub>3</sub>** with **N≡C-NH<sup>-</sup>** in 50%-MeCN-50% H<sub>2</sub>O at 25 °C.

| [CAN]/M | $k_{\text{obs}}^1/\text{s}^{-1}$ |
|---------|----------------------------------|
| 0.025   | 0.784                            |
| 0.035   | 1.108                            |
| 0.050   |                                  |
| 0.063   | 1.878                            |
| 0.075   | 2.277                            |
| 0.088   | 2.657                            |
| 0.100   | 3.067                            |

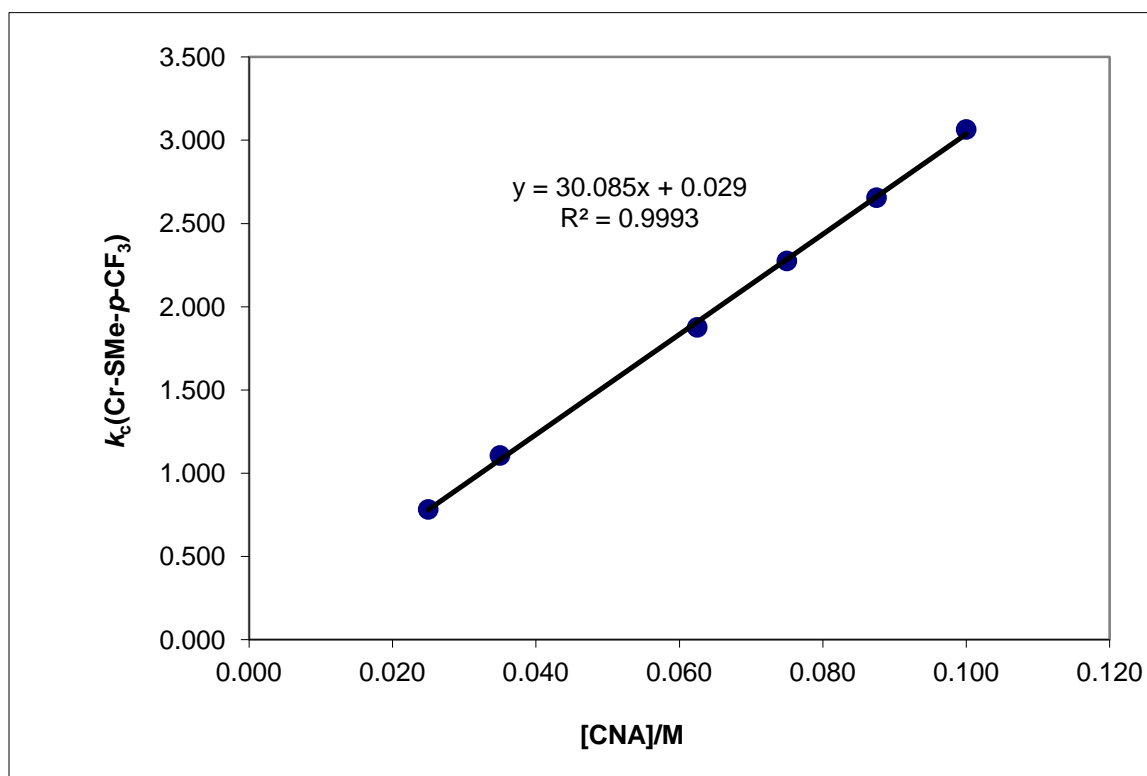

**Figure S4(i).** Plot of  $k_{\text{obs}}^1$  vs.  $[\text{N}\equiv\text{C-NH}^-]$  for the reaction between **Cr-SMe-*p*-CF<sub>3</sub>** with **N≡C-NH<sup>-</sup>** in 50%-MeCN- 50% H<sub>2</sub>O at 25 °C.

**Table S4(j).** Summary of substituent constants and rate constants for the reactions of  $\text{N}\equiv\text{C-NH}^-$  with **Cr-SMe-Z** in 50% MeCN-50% Water (v/v) at 25 °C

| Substituent | $\sigma$ | $\log(k_1)$ | $k_1/\text{M}^{-1}\text{s}^{-1}$ |
|-------------|----------|-------------|----------------------------------|
| CF3         | 0.540    | 1.478       | 30.08                            |
| Cl(3)       | 0.370    | 1.303       | 20.09                            |
| Cl          | 0.230    | 1.236       | 17.22                            |
| F           | 0.060    | 1.215       | 16.40                            |
| H           | 0.000    | 0.968       | 9.30                             |
| Me          | -0.170   | 0.823       | 6.66                             |
| Ome         | -0.270   | 0.702       | 5.03                             |
| NMe2        | -0.830   | 0.217       | 1.65                             |

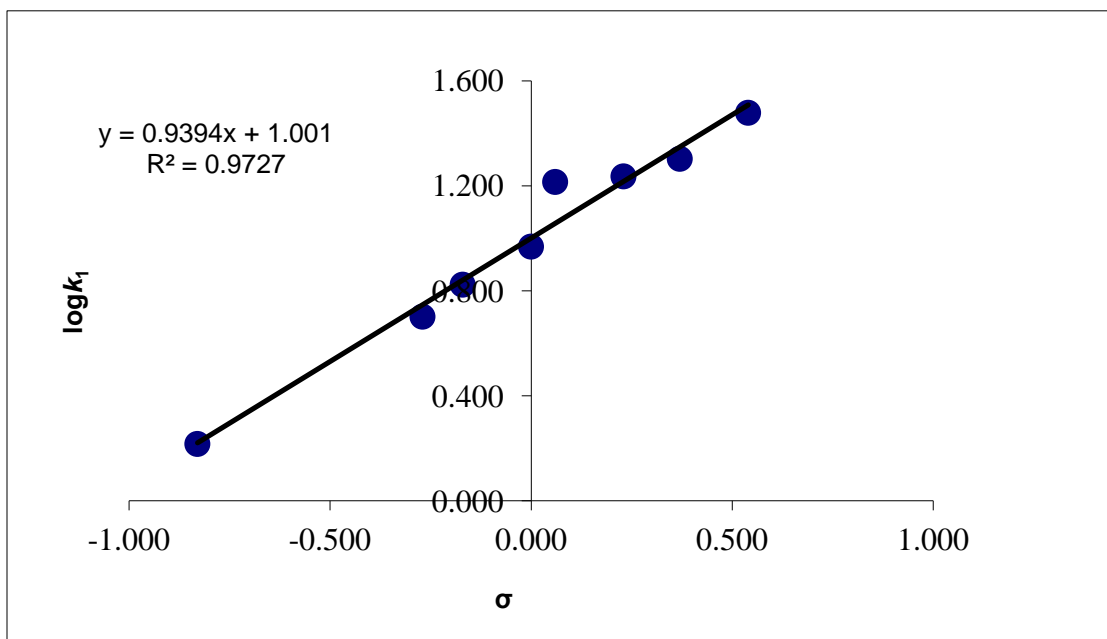

**Figure S4(j)** . Hammett plot for the reactions of  $\text{N}\equiv\text{C-NH}^-$  with **Cr-SMe-Z** in 50% MeCN-50% Water (v/v) at 25 °C
